1 **Axonal ER Ca<sup>2+</sup> Release Enhances Miniature, but Reduces Activity-**  
2 **Dependent Glutamate Release in a Huntington Disease Model**

3  
4 James P. Mackay<sup>1</sup>, Amy I. Smith-Dijak<sup>1,2</sup>, Ellen T. Koch<sup>1,2</sup>, Peng Zhang<sup>1</sup>, Evan Fung, Wissam  
5 B. Nassrallah<sup>1,3</sup>, Caodu Buren<sup>1,2</sup>, Mandi Schmidt<sup>2,4</sup>, Michael R. Hayden<sup>4</sup> and \*Lynn A.  
6 Raymond<sup>1</sup>  
7

8  
9  
10 <sup>1</sup> Department of Psychiatry, Djavad Mowafaghian Centre for Brain Health,

11 <sup>2</sup> Graduate Program in Neuroscience

12 <sup>3</sup>MD/PhD Program

13 <sup>4</sup> Centre for Molecular Medicine and Therapeutics, BC Children's Hospital Research Institute

14 University of British Columbia, Vancouver, British Columbia, Canada  
15  
16  
17  
18

19 \*Correspondence addressed to:

20 Lynn A. Raymond, MD, PhD

21 Department of Psychiatry and Djavad Mowafaghian Centre for Brain Health

22 University of British Columbia

23 4834-2255 Wesbrook Mall

24 Vancouver, BC Canada V6T 1Z3

25 Lynn.raymond@ubc.ca

26 **Abstract**

27

28 Action potential-independent (miniature) neurotransmission occurs at all chemical synapses, but  
29 remains poorly understood, particularly in pathological contexts. Spontaneous release of  $\text{Ca}^{2+}$  from  
30 the axonal endoplasmic reticulum (ER) is thought to facilitated miniature neurotransmission, and  
31 aberrant ER  $\text{Ca}^{2+}$  handling is notably implicated in the progression of Huntington’s disease (HD)  
32 and other neurodegenerative diseases. Here, we report elevated glutamate-mediated miniature  
33 synaptic event frequencies in YAC128 (HD-model) cortical neurons, which pharmacological  
34 experiments suggest is mediated by enhanced spontaneous ER  $\text{Ca}^{2+}$  release. Calcium imaging  
35 using an axon-localized sensor revealed slow action potential (AP)-independent axonal  $\text{Ca}^{2+}$   
36 waves, which were more common in YAC128 cortical neurons. Conversely, spontaneous axonal  
37 ER  $\text{Ca}^{2+}$  release was associated with reduced AP-dependent axonal  $\text{Ca}^{2+}$  events and consequent  
38 glutamate release. Together, our results suggest spontaneous release of axonal ER  $\text{Ca}^{2+}$  stores  
39 oppositely regulates activity-dependent and -independent neurotransmitter release in HD, with  
40 potential implications for the fidelity and plasticity of cortical excitatory signaling.

41

42

43 **Introduction**

44

45 Huntington’s disease (HD) is a fatal, autosomal dominantly-inherited neurodegenerative disorder  
46 caused by a polyglutamine-encoding CAG repeat-expansion (>35 repeats) in exon-1 of the  
47 huntingtin gene (“A novel gene containing a trinucleotide repeat that is expanded and unstable on  
48 Huntington’s disease chromosomes. The Huntington’s Disease Collaborative Research Group.”)

49 1993). Disease onset is typically in middle age, characterized by progressively disordered  
50 movement and declining cognition (Bachoud-Lévi et al., 2019). Although the mutant huntingtin  
51 protein (mHTT) is widely expressed, GABAergic spiny projection neurons (SPN)s of the striatum  
52 and pyramidal neurons of the cerebral cortex show the most severe degeneration in HD  
53 (Graveland, Williams, & DiFiglia, 1985; Vonsattel et al., 1985). Cortical glutamatergic afferents  
54 extensively innervate striatal SPNs and dysfunction at these synapses is thought to precede overt  
55 neuron loss in HD (Raymond et al., 2011).

56

57 Glutamate-mediated toxicity was initially proposed to contribute to pathogenesis in HD based on  
58 studies showing that striatal injections of glutamate receptor agonists largely recapitulate HD  
59 pathology in animals (Beal et al., 1986; Hantraye, Riche, Maziere, & Isacson, 1990). More  
60 recently, studies in SPNs from transgenic and knock-in mouse models of HD demonstrate  
61 enhanced extrasynaptic N-Methyl-D-Aspartate receptor (NMDAR) surface expression and  
62 function that may explain, in part, increased susceptibility to excitotoxic challenges (Botelho et  
63 al., 2014; Fan, Fernandes, Zhang, Hayden, & Raymond, 2007; Kovalenko et al., 2018; Milnerwood  
64 et al., 2010; Plotkin et al., 2014; Zeron et al., 2002). Cell stress/death signaling mediated by  
65 elevated levels of extrasynaptic NMDARs in HD SPNs may be further exacerbated by reduced  
66 glutamate transporter function (Miller et al., 2008), although recent studies show glutamate  
67 clearance after synaptic release is normal or accelerated in striatal and cortical brain slice (Parsons  
68 et al., 2016). Additionally, some studies show synaptic glutamate release from cortical afferents is  
69 altered in HD mouse models, possibly contributing to excitotoxicity and synaptic dysfunction  
70 (Cepeda et al., 2003; Joshi et al., 2009; Raymond et al., 2011). However, the direction of this effect

71 appears to be model and disease-stage dependent; relative to wildtype (WT), glutamate release is  
72 typically enhanced early, but reduced with disease progression in HD mice (Joshi et al., 2009).

73  
74 Mutant HTT (mHTT) directly interacts with endoplasmic reticulum (ER) type-1 inositol (1,4,5)-  
75 triphosphate receptors (IP3Rs) sensitizing their Ca<sup>2+</sup> release in response to IP3 (Tang et al., 2003);  
76 blocking this interaction normalizes IP3-induced ER Ca<sup>2+</sup> release *in vitro* and improves behavioral  
77 outcomes in HD-model mice (Tang, Guo, Wang, Chen, & Bezprozvanny, 2009). Furthermore,  
78 evidence suggests Ryanodine receptors, which are ER-localized Ca<sup>2+</sup> channels that mediate Ca<sup>2+</sup>-  
79 induced Ca<sup>2+</sup> release, are constitutively leaky in HD mouse models (Suzuki, Nagai, Wada, &  
80 Koike, 2012). Although these studies focused on the soma and dendrites of SPNs at the  
81 postsynaptic side of cortical-striatal synapses, ER is found in all neuronal compartments, including  
82 presynaptic terminals, where its Ca<sup>2+</sup> stores, when released, modulate neurotransmission  
83 (Emptage, Reid, & Fine, 2001; Llano et al., 2000). However, it is unknown whether presynaptic  
84 ER Ca<sup>2+</sup> handling is also dysfunctional in HD and if such a process contributes to altered glutamate  
85 release from cortical synaptic terminals.

86  
87 Here, we have investigated whether glutamate release is altered, and if ER Ca<sup>2+</sup> dysregulation  
88 contributes to aberrant function, in presynaptic terminals of cortical pyramidal neurons from  
89 premanifest HD-model mice expressing full-length mHTT with 128 CAG-repeats in a yeast  
90 artificial chromosome (YAC128). Our results from neuronal cultures and acute cortical-striatal  
91 brain slices demonstrate a shift in balance favoring increased action potential (AP)-independent  
92 (miniature) vs. AP-dependent glutamate release, and that altered ER Ca<sup>2+</sup> release contributes to  
93 this change. This may have important previously unidentified disease implications, given the

94 distinct physiologically relevant signaling potentially mediated by miniature neurotransmission  
95 (Fishbein & Segal, 2007; Kavalali, 2015). Ultimately our data contribute to growing evidence for  
96 cortex and striatal synaptic dysfunction in HD, and support a key role for ER Ca<sup>2+</sup> dysregulation  
97 in this pathophysiology.

98

## 99 **Results**

100

### 101 **Mini EPSC frequencies are elevated in YAC128 cortical cultures at early time points**

102

103 Our group previously recorded miniature excitatory post synaptic currents (mEPSCs) from striatal  
104 spiny projection neurons (SPNs) co-cultured with cortical neurons from prenatal WT or yeast  
105 artificial chromosome (YAC128) mice. YAC128 SPNs showed elevated mEPSC frequencies,  
106 compared to WT, at day in vitro (DIV) 14 – a time point when SPN dendritic arborization patterns  
107 and spine numbers were similar between genotypes (Buren, Parsons, Smith-Dijak, & Raymond,  
108 2016). At DIV21, YAC128 SPNs showed a significant reduction in total dendritic length, and  
109 therefore reduced total excitatory synapse numbers, compared to WT. Despite this, mEPSC  
110 frequencies onto WT and YAC128 SPNs were comparable at DIV21.

111

112 The above results suggested a higher rate of action potential-independent glutamate release from  
113 YAC128 presynaptic cortical pyramidal neuron (CPN) terminals onto individual SPN synapses.  
114 Here, we capitalize on a relatively simpler culture preparation containing only cortex-derived  
115 neurons and YAC128 mouse-derived brain slices to mechanistically dissect how mutant huntingtin

116 protein expression affects action potential-independent and -dependent glutamate release from  
117 CPN terminals.

118

119 To establish whether miniature glutamate release is enhanced at YAC128 CPN terminals targeting  
120 other CPNs, we first established WT and YAC128 CPN mEPSC parameters in cortical cultures at  
121 various DIV ages (7, 14, 18 and 21). In general, both genotypes showed increased mEPSC  
122 frequencies with culture time. However, YAC128 CPN mEPSC frequencies were consistently  
123 higher than age-matched WT controls after DIV7 and up until DIV21, at which point mEPSC  
124 frequencies became comparable between genotypes (**Figure 1**), as was also the case in the co-  
125 culture model (Buren et al., 2016). The greatest genotype mEPSC frequency difference occurred  
126 at DIV14, when mean YAC128 CPN frequencies were more than double that of WT:  $10.83 \pm 1.80$   
127 Hz vs  $4.52 \pm 0.60$  Hz, respectively (**Figure 1D, E**). YAC128 mEPSC frequencies remained  
128 significantly higher than WT at DIV18:  $14.07 \pm 1.54$  Hz vs  $9.92 \pm 1.54$  Hz, respectively (**Figure**  
129 **1G, H**). Age matched YAC128 and WT CPNs showed similar mEPSC amplitudes across all DIV  
130 time points examined (**Figure 1 C, F, I and L**). We chose to perform subsequent experiments  
131 probing the mechanistic details underlying increased cortical mini glutamate release in DIV18  
132 cortical monocultures, since this was the most mature culture stage at which mEPSC frequencies  
133 were elevated in YAC128 CPNs.

134

135

136

137

138 **Synapse numbers and dendritic complexity are similar in WT and YAC128 cortical**  
139 **pyramidal neurons at DIV 18**

140

141 The higher mEPSC frequencies seen in DIV18 YAC128 CPNs suggest an increased presynaptic  
142 glutamate release probability. However, relative differences in synapse numbers could also  
143 account for this finding. To estimate numbers of synapses, we first expressed cytosolic GFP in a  
144 small proportion of neurons in WT and YAC128 cortical cultures and imaged full CPN dendritic  
145 arbors at DIV18. Sholl analysis revealed similar arborization patterns and total dendritic length in  
146 WT and YAC128 CPNs (**Supplemental Figure 1A, C**). In separate cultures, we expressed an  
147 internal GFP-tagged anti-PSD95 antibody (Gross et al., 2013) in a subset of neurons and immuno-  
148 stained for VGlut1, to identify glutamatergic terminals, and the GluA2 AMPA receptor subunit,  
149 to identify functional synapses. Functional synapse numbers, defined as GFP-labeled PSD95  
150 puncta colocalized with VGlut1 and GluA2 immunofluorescent-labeled puncta, were not  
151 significantly different between DIV18 WT and YAC128 CPNs, although there was a trend towards  
152 lower synapse density in YAC128 CPNs (**Supplemental Figure 1E, F**). Together with the above  
153 data showing increased mEPSC frequency in YAC128 CPNs at DIV18 (**Figure 1**), these results  
154 point to an increase in miniature vesicular glutamate release from cortical terminals in YAC128  
155 cultures.

156

157

158

159

160 **Releasing ER calcium with low dose ryanodine or caffeine increases the miniature EPSC**  
161 **frequency in WT, but not YAC128 cultures**

162

163 Studies using mouse models suggest Ca<sup>2+</sup> release from ER stores is aberrant in HD due to increased  
164 IP3 and ryanodine receptor activity (Suzuki et al., 2012; Tang et al., 2003). Although effects of  
165 mHTT on the presynaptic ER have not been specifically studied, we hypothesized a presynaptic  
166 ER leak elevates cytosolic Ca<sup>2+</sup>, thereby mediating the increased miniature glutamate release seen  
167 in our YAC128 cultures (**Figure 2A, B**). To test this hypothesis, we first recorded mEPSCs before  
168 and during local application of low dose (5 μM) ryanodine to cultured CPNs; 5 μM ryanodine  
169 releases ER Ca<sup>2+</sup> by opening ryanodine receptors (Meissner, 2017). In WT cultures, 5 μM  
170 ryanodine nearly doubled the CPN mEPSC frequency: from 6.74 ± 1.17 Hz to 11.91 ± 2.36 Hz  
171 [Students' paired T-test; p=0.0280; n=13 cells] (**Figure 2C - E**). In YAC128 cultures, however,  
172 ryanodine (5 μM) did not significantly alter the CPN mEPSC frequency: 11.98 ± 1.66 Hz vs 13.89  
173 ± 2.01 Hz - under control conditions and in ryanodine (5 μM) respectively (**Figure 2F - H**). A  
174 Comparison of the percent change in mEPSC frequency following ryanodine (5 μM) revealed a  
175 significantly greater response in WT than in YAC128 CPNs [31.7 ± 7.5 % (n=13) vs 5.2 ± 9.5 %  
176 (n=15) in WT and YAC128 CPNs respectively (Students' unpaired T-test; p=0.0418)]. We next  
177 used caffeine (1 mM) as an alternative means of agonizing ryanodine receptors; this more  
178 prominently increased the mEPSC frequency in WT cultures, but otherwise produced similar  
179 results (**Supplemental Figure 2**).

180

181



182 **Removing extracellular Ca<sup>2+</sup> and blocking the ER SERCA pump substantially reduces the**  
183 **mEPSC frequency in YAC128 but not WT cultures**

184

185 If an ongoing release of presynaptic ER Ca<sup>2+</sup> in YAC128 cultures occludes potentiation of synaptic  
186 glutamate release by low dose ryanodine and caffeine, blocking ER Ca<sup>2+</sup> release should reduce  
187 synaptic glutamate release in YAC128 cultures. To test this, we pre-incubated cultures with  
188 extracellular fluid (ECF) containing the sarco/endoplasmic reticulum Ca<sup>2+</sup>-ATPase (SERCA)  
189 pump inhibitor cyclopiazonic acid (CPA) (30 μM) to deplete ER Ca<sup>2+</sup> stores. Since ER Ca<sup>2+</sup>  
190 depletion can increase cytosolic Ca<sup>2+</sup> by engaging the store operated Ca<sup>2+</sup> response, and this effect  
191 can increase mini neurotransmitter release (Emptage et al., 2001), we performed these experiments  
192 in the absence of extracellular Ca<sup>2+</sup>. Under these conditions, YAC128 CPNs showed a mean  
193 mEPSC frequency of 3.33 ± 0.57 Hz (n=14), significantly lower than seen in WT CPNs under  
194 identical conditions 8.41 ± 1.50 Hz (n=17) (Student's unpaired t-test; p=0.0062) (**Figure 2I-K**).  
195 These results suggest that an ER calcium leak into the cytoplasm elevates mini vesicular glutamate  
196 release from YAC128 CPN terminals, and that in the absence of this effect, the intrinsic vesicular  
197 release probability is actually reduced in YAC128 compared to WT cortical terminals.

198

199 **Presynaptic Ca<sup>2+</sup> sparks and waves are more frequent in YAC128 cultures**

200

201 To directly monitor presynaptic Ca<sup>2+</sup> dynamics, we next fused GCaMP6-M (T.-W. Chen et al.,  
202 2013) with the rat synaptophysin protein via a small glycine-serine linker to generate a genetically-  
203 encoded Ca<sup>2+</sup> sensor that preferentially localizes to presynaptic terminals. We expressed this rat  
204 synaptophysin-tagged GCaMP6-M construct (rSyph-GCaMP6m) in neurons in cortical cultures

205 and performed Ca<sup>2+</sup> imaging experiments, first in the presence of TTX (500 nM) to relate  
206 presynaptic Ca<sup>2+</sup> signaling to our mEPSC findings (above). Remarkably, both YAC128 and WT  
207 cultures showed spontaneous axonal Ca<sup>2+</sup> sparks, often beginning in single boutons, then initiating  
208 slow Ca<sup>2+</sup> waves spreading to neighboring boutons (**Figure 3A, B**). In some cases, the above waves  
209 slowly traversed axons encompassing entire 63X (178.6 μm x 113.1 μm) imaging fields over  
210 multiple seconds of imaging. Conversely, axonal Ca<sup>2+</sup> events in the absence of TTX could not be  
211 temporally resolved (owing to relatively slow GCaMP kinetics) and appeared simultaneously  
212 across all the boutons of a given imaged axon. These mini presynaptic Ca<sup>2+</sup> events in TTX were  
213 also strikingly long lasting at individual boutons - on average 5 - 10 times longer than that of  
214 typical events seen in the absence of TTX (**Figure 3C, D**). These miniature presynaptic Ca<sup>2+</sup> events  
215 in TTX were more than three times as frequent in YAC128 cultures than in WT cultures (**Figure**  
216 **3E**), but event DF/F amplitudes did not significantly differ between genotypes (**Figure 3F**). The  
217 detection algorithm used here (see methods) considered Ca<sup>2+</sup> waves involving multiple axonal  
218 boutons as single events (as in **Figure 3A**). However, the mean event area was similar in both  
219 genotypes (not illustrated), suggesting similar numbers of axonal boutons were recruited on  
220 average by such events in YAC128 and WT cultures. In subsets of WT and YAC128 cultures we  
221 also expressed an mCherry-tagged PSD95 construct. In these cultures, we repeatedly observed  
222 clear colocalizations between rSyph-GCaMP6m-labeled boutons, spontaneously active in TTX,  
223 and mCherry-labeled dendritic spines (not illustrated). Thus although we cannot be certain that all  
224 boutons showing spontaneous Ca<sup>2+</sup> events in TTX participate in synaptic connections, it is clear  
225 that such events are not restricted to ectopic boutons.

226

227

228 **Basal cytosolic Ca<sup>2+</sup> is higher in YAC128 presynaptic boutons**

229

230 In a subset of TTX experiments, we applied the Ca<sup>2+</sup> ionophore ionomycin (10 μM) to cultures  
231 following GCaMP imaging. By equilibrating cytosolic Ca<sup>2+</sup> to extracellular levels, this approach  
232 allowed quantification of GCaMP fluorescence in the presence of the known extracellular Ca<sup>2+</sup>  
233 concentration (here 2 mM). Thus, smaller ionomycin-mediated increases in GCaMP fluorescence  
234 indicate relatively higher basal (pre-ionomycin) cytosolic Ca<sup>2+</sup> concentrations (Lindhout et al.,  
235 2019). In both genotypes, ionomycin-mediated changes in presynaptic GCaMP fluorescence  
236 (DF/F) were significantly smaller in boutons that had shown at least one spontaneous Ca<sup>2+</sup> event  
237 in the previous 3 min recording (**Figure 4A, D**), indicating higher basal cytosolic Ca<sup>2+</sup>  
238 concentrations in these spontaneously active boutons. Furthermore, overall ionomycin responses  
239 were significantly smaller in YAC128 cultures than in WT cultures when comparing the entire  
240 population of boutons imaged in a culture (both spontaneously active and inactive) (**Figure 4E**).

241

242 **Caffeine increases basal Ca<sup>2+</sup> and miniature events in WT, but not YAC128 cortical boutons**

243

244 The slow kinetics of the above miniature presynaptic Ca<sup>2+</sup> events are consistent with ER-mediated  
245 Ca<sup>2+</sup> waves reported in postsynaptic neuronal compartments (Ross, 2012). We next tested whether  
246 these presynaptic Ca<sup>2+</sup> events were affected by caffeine (1 mM), an ER ryanodine receptor agonist  
247 that substantially increased mEPSC frequencies in WT, but not YAC128 cultures (above). In the  
248 presence of TTX, caffeine (1 mM) significantly increased the presynaptic Ca<sup>2+</sup> event frequency in  
249 WT cultures (**Figure 5A**), but did not significantly alter event frequency in YAC128 cultures  
250 (**Figure 5B**).

251  
252 Significant photobleaching of the rSyph-GCaMP6m construct occurred with prolonged imaging;  
253 this combined with the relative infrequency of mini presynaptic  $\text{Ca}^{2+}$  events necessitated imaging  
254 of separate fields for the above control and caffeine comparisons. We next performed within-  
255 bouton measurements of basal rSyph-GCaMP6m fluorescence before and immediately following  
256 application of caffeine; the relatively short duration of these experiments made before and after  
257 measurements feasible. A clear slow increase in basal rSyph-GCaMP6m fluorescence was seen in  
258 most WT boutons following caffeine (1 mM) application (**Figure 5C**), which was generally absent  
259 or reduced in YAC128 boutons (**Figure 5D**). Overall a significantly greater caffeine (1 mM)-  
260 mediated increase in rSyph-GCaMP6m fluorescence was seen in WT boutons compared to  
261 YAC128 (**Figure 5E**).

262

263

264 **Action potential-dependent  $\text{Ca}^{2+}$  signals in presynaptic cortical terminals Are less frequent**  
265 **in YAC128 cultures**

266

267 We next used the rSyph-GCaMP6m construct in the absence of TTX to examine presynaptic action  
268 potential-dependent  $\text{Ca}^{2+}$  signals in WT and YAC128 cortical cultures. When neuronal action  
269 potential firing was intact, rSyph-GCaMP6m -expressing boutons in both WT and YAC128  
270 cultures were dominated by presumably voltage-gated  $\text{Ca}^{2+}$  channel-mediated signals (**Figure 6A,**  
271 **B**). These signals were more frequent than those seen in the presence of TTX, but of far shorter  
272 duration. Interestingly, these activity-dependent  $\text{Ca}^{2+}$  events were nearly twice as frequent in WT  
273 axonal boutons, compared to those in YAC128 cultures (**Figure 6A, C and E**). Ryanodine (5  $\mu\text{M}$ )

274 modestly but significantly reduced the frequency of these events in WT cultures (by 17 %) (**Figure**  
275 **6A, B and E**). Conversely, 5  $\mu$ M ryanodine elicited a modest, but significant increase in the  
276 frequency of these events in YAC128 cultures (**Figure 6C- E**).

277

278 As discussed above, rSyph-GCaMP6m events in the presence of TTX were typically much longer  
279 in duration than action potential-dependent events in both genotypes and appeared to be restricted  
280 to a subset of boutons with higher resting  $\text{Ca}^{2+}$  concentrations. Interestingly, similar strikingly  
281 long-lasting events continued to occur in subsets of boutons in the absence of TTX. In an attempt  
282 to identify boutons exhibiting these slow  $\text{Ca}^{2+}$  events, we next categorized boutons imaged in the  
283 absence of TTX based on whether one or more  $\text{Ca}^{2+}$  events with a duration greater than 6 s  
284 (measured at half peak amplitude) occurred during a 3 min recording. 6 s was chosen as the cutoff  
285 value, because it was more than 5 standard deviations greater than the mean event duration seen  
286 in WT and YAC128 boutons in the absence of TTX, but comparable to average event durations in  
287 TTX in both genotypes: [ $8.60 \pm 0.92$  s (n=164) and  $6.23 \pm 0.35$  s (n=440) in WT and YAC128  
288 boutons respectively]. Without TTX, 7.9 % (23/292) of WT boutons showed one or more events  
289 lasting longer than 6 s, while under identical conditions 10.4 % (44/423) of YAC128 boutons  
290 showed at least one such event. Interestingly in both genotypes, overall event frequencies were  
291 significantly lower in boutons showing one or more slow events (>6 s) than in boutons showing  
292 only short duration events (**Figure 6F- I**). Assuming boutons displaying these long lasting  $\text{Ca}^{2+}$   
293 events correspond to the same population that is spontaneously active in TTX, these results suggest  
294 action potential-dependent  $\text{Ca}^{2+}$  events are reduced in the bouton population with higher resting  
295 cytosolic  $\text{Ca}^{2+}$  levels and spontaneous ER release events. Taken together, experiments up to this  
296 point suggest that releasing presynaptic ER  $\text{Ca}^{2+}$  elevates miniature vesicular glutamate release,

297 but can also reduce activity-dependent presynaptic  $\text{Ca}^{2+}$  influx, and imply that the spontaneous or  
298 pharmacological release of presynaptic ER  $\text{Ca}^{2+}$  oppositely regulates miniature and action  
299 potential-dependent glutamate release.

300

### 301 **Low dose ryanodine reduces evoked glutamate release in WT- but not YAC128-derived** 302 **brain slices**

303

304 We next performed experiments in cortical-striatal *ex-vivo* brain slices prepared from 2 – 3 month  
305 old WT and YAC128 mice expressing the fluorescent glutamate sensor iGluSnFR in striatal  
306 neurons (Parsons et al. 2016; Koch et al. 2018). This preparation allowed direct optical  
307 measurement of glutamate release in the striatum, independent of postsynaptic neuronal properties.  
308 Striatal iGluSnFR signals evoked by stimulating cortical axons of the corpus callosum were  
309 significantly decreased by ryanodine (5  $\mu\text{M}$ ) in WT, but not YAC128 slices (**Figure 7**). These data  
310 are consistent with results in culture (Figs. 6), suggesting that AP-dependent glutamate release is  
311 reduced in YAC128 as a consequence of a tonic  $\text{Ca}^{2+}$  leak from ER stores

312

### 313 **Discussion**

314

315 Presynaptic neurotransmitter release and consequent postsynaptic signaling largely underlies  
316 communication between neurons, thus forming the basis of brain circuitry. Neurotransmitter  
317 release in turn, can be broadly divided into action potential-dependent or independent forms. The  
318 former requires presynaptic voltage-gated  $\text{Ca}^{2+}$  channel activation coordinated by sodium action  
319 potentials; while the latter persists in the absence of neuronal activity. Although miniature

320 neurotransmission is poorly understood compared to its activity-dependent counterpart, it is  
321 increasingly accepted to subserve clear physiological functions (Frank, Kennedy, Goold, Marek,  
322 & Davis, 2006; McKinney, Capogna, Dürr, Gähwiler, & Thompson, 1999; Sutton et al., 2006).  
323 Moreover, miniature release can be regulated relatively independently of action potential-  
324 dependent release and may even be mediated by distinct vesicular pools (Fredj & Burrone, 2009;  
325 Sara, Virmani, Deák, Liu, & Kavalali, 2005).

326

327 Alterations in synaptic signaling processes, particularly relating to the excitatory transmitter  
328 glutamate, have been repeatedly reported in models of HD (Raymond et al., 2011; Sepers et al.,  
329 2017; Tyebji & Hannan, 2017) and other neurodegenerative diseases (R. Wang & Reddy, 2017).  
330 Increased cell-surface expression of extra-synaptic NMDA receptors by SPNs favors excitotoxic  
331 postsynaptic glutamate-mediated signaling in HD models (Milnerwood et al., 2010). Mounting  
332 evidence also suggests glutamate release from cortical afferents is altered in HD; however, the  
333 direction of this alteration appears to be disease-stage-dependent (Cepeda et al., 2003; Joshi et al.,  
334 2009).

335

336 The endoplasmic reticulum (ER), a continuous intracellular membrane-system involved in  $\text{Ca}^{2+}$   
337 storage and protein synthesis, is expressed in all neuronal processes including axons and  
338 presynaptic boutons. Increased cytosolic  $\text{Ca}^{2+}$ -release from the ER has been shown in HD models,  
339 as a result of a mutant huntingtin protein (mHTT)-mediated increase in IP<sub>3</sub> receptor  
340 responsiveness (Tang et al., 2003) and a constituent ryanodine receptor  $\text{Ca}^{2+}$  leak (Suzuki et al.,  
341 2012). Previous HD studies have focused on the postsynaptic ER, however  $\text{Ca}^{2+}$  release from the  
342 presynaptic ER is known to modulate neurotransmitter release (Emptage et al., 2001; Llano et al.,

343 2000). Results of our study suggest mHTT expression alters ER  $\text{Ca}^{2+}$  handling at stores in close  
344 proximity to cortical presynaptic terminals, thereby altering glutamate release. This mechanism  
345 clearly increased the frequency of  $\text{Ca}^{2+}$ -dependent, action potential-independent (mini) synaptic  
346 glutamate events in our YAC128 model. Conversely, our findings suggest reduced action  
347 potential-dependent glutamate release from YAC128 cortical terminals. As we have focused  
348 exclusively on glutamatergic synapses, future experiments will be required to determine if this  
349 mechanism similarly affects the release of other neurotransmitters and neuromodulators.

350

351

352 **Spontaneous axonal  $\text{Ca}^{2+}$  signaling increases the YAC128 miniature glutamate release**  
353 **frequency**

354

355 CPNs in YAC128 cortical cultures at DIV14 and DIV18 showed higher mEPSCs frequencies  
356 compared to CPNs in age-matched WT cultures. However by DIV 21, mEPSC frequencies were  
357 similar between WT and YAC128 CPNs. This pattern is reminiscent of SPN mEPSC frequencies  
358 in YAC128 cortical-striatal co-cultures, which were also higher relative to WT at early DIV ages,  
359 but comparable to WT by DIV21 (Buren et al., 2016). In the co-culture model, the total dendritic  
360 length of YAC128 SPNs was reduced relative to WT at DIV21, indicating reduced total SPN  
361 synapse numbers may have masked ongoing elevated glutamate release rates from individual  
362 YAC128 cortical terminals. We suspect that in our cortical cultures, degenerative changes at  
363 DIV21 likewise obscured the elevated YAC128 CPN mEPSC frequencies clearly seen at earlier  
364 DIV ages. Notably in DIV18-aged cortical cultures, the time point at which we performed  
365 mechanistic experiments, no genotype differences in CPN synapse density and dendritic



366 morphology were evident, indicating that differences in mEPSC frequencies likely reflected  
367 altered rates of release at individual presynaptic sites. In any case, increased rates of miniature  
368 glutamate release appear to be an early and perhaps enduring phenotype of cultured YAC128  
369 CPNs.

370

371 Caffeine or low dose ryanodine, which release ER  $\text{Ca}^{2+}$  by opening ryanodine receptors, failed to  
372 increase the mEPSC frequency in YAC128 CPNs, despite robustly increasing the WT mEPSC  
373 frequency. This result, in concert with the increased basal YAC128 mEPSC frequency, suggests  
374 an ongoing spontaneous  $\text{Ca}^{2+}$  store release in YAC128 cultures occludes facilitation of the mEPSC  
375 frequency by drug-mediated  $\text{Ca}^{2+}$  store release. The substantially lower CPN mEPSC frequency  
376 seen in YAC128 cultures incubated with the ER SERCA pump inhibitor CPA in nominally zero  
377 extracellular  $\text{Ca}^{2+}$ , is also consistent with a strong ER-derived  $\text{Ca}^{2+}$ -dependence of YAC128 mini  
378 glutamate release. Conversely, mEPSC frequencies in WT cultures were not substantially reduced  
379 under identical conditions; this resulted in significantly higher WT than YAC128 mEPSC  
380 frequencies in CPA and 0 mM extracellular  $\text{Ca}^{2+}$ , notably opposite the relationship seen without  
381 CPA in standard (2 mM) extracellular  $\text{Ca}^{2+}$ . This was unexpected given overall WT and YAC128  
382 CPN synapse numbers were similar in these cultures, but may indicate a reduction in functional  
383 YAC128 synapses, not apparent in fixed culture images, or deficits in the YAC128 synaptic release  
384 machinery, as suggested in previous studies (Morton & Edwardson, 2001; Morton, Faull, &  
385 Edwardson, 2001). In either case, enhanced  $\text{Ca}^{2+}$ -dependent mini glutamate release in YAC128  
386 cultures clearly surmounts any such deficits. These results also suggest mini glutamate release in  
387 WT cultures is largely  $\text{Ca}^{2+}$ -independent. In contrast, Xu et. al (2009) reported mini glutamate  
388 release in similar cortical cultures persisted in the absence of extracellular  $\text{Ca}^{2+}$ , but was nearly

389 completely dependent on internal  $\text{Ca}^{2+}$  stores and blocked by preincubation with the membrane-  
390 permeant  $\text{Ca}^{2+}$  chelator BAPTA-AM (Xu, Pang, Shin, & Südhof, 2009). If this were true in our  
391 cultures, we would expect  $\text{Ca}^{2+}$  store depletion (with CPA), in concert with removal of extracellular  
392  $\text{Ca}^{2+}$ , to similarly abolish mini release. However CPA is reported to only partially deplete  
393 presynaptic ER  $\text{Ca}^{2+}$  (de Juan-Sanz et al., 2017), therefore a role of residual ER  $\text{Ca}^{2+}$  in maintaining  
394 mini release in WT cultures under these conditions cannot be excluded.

395

396 Despite a clear role of ER  $\text{Ca}^{2+}$  in mini release in a variety of neuronal preparations, the temporal  
397 and spatial dynamics of action potential-independent presynaptic ER  $\text{Ca}^{2+}$  signals are largely  
398 unclear. Imaging the rSyph-GCaMP6m probe in TTX revealed spontaneous, presynaptic  $\text{Ca}^{2+}$   
399 events that often initiated  $\text{Ca}^{2+}$  waves traversing cortical axons. These events were more frequent  
400 in YAC128 cultures and showed strikingly slow kinetics in both genotypes, consistent with ER  
401  $\text{Ca}^{2+}$  waves reported in dendrites and non-neuronal cell-types (Ross, 2012). Caffeine substantially  
402 increased the mini axonal  $\text{Ca}^{2+}$  event frequency in WT cultures to levels comparable to that seen  
403 in YAC128 cultures, but failed to significantly change the event frequency in YAC128 cultures.  
404 The congruence of these results with our mEPSC findings (above) suggests these axonal  $\text{Ca}^{2+}$   
405 events underlie the increased YAC128 mini glutamate release frequencies.

406

407 Basal cytosolic  $\text{Ca}^{2+}$  concentrations were higher in axonal boutons showing spontaneous  $\text{Ca}^{2+}$   
408 activity in TTX, compared to inactive boutons, in both genotypes. Elevated cytosolic  $\text{Ca}^{2+}$  levels  
409 may therefore be required to precipitate the initial ryanodine or IP3 receptor opening needed to  
410 incite the regenerative ER  $\text{Ca}^{2+}$ -induced  $\text{Ca}^{2+}$  release we presume underlie these axonal  $\text{Ca}^{2+}$   
411 events. Interestingly, the restriction of spontaneous  $\text{Ca}^{2+}$  signals to a subset of cortical boutons

412 with higher basal  $\text{Ca}^{2+}$  concentrations may mean mini glutamate release is not uniform across  
413 cortical boutons, but favored from this population of spontaneously active boutons. Indeed,  
414 subpopulations of synapses favoring mini release have been described in other neuronal systems  
415 (Atasoy et al., 2008; Peled, Newman, & Isacoff, 2014; Reese & Kavalali, 2016). We suspect the  
416 higher basal cytosolic  $\text{Ca}^{2+}$  concentrations in the overall YAC128 axonal bouton population meant  
417 a greater proportion were capable of sustaining spontaneous  $\text{Ca}^{2+}$  activity. Caffeine application  
418 increased the baseline cytosolic  $\text{Ca}^{2+}$  concentration and frequency of spontaneous events in WT,  
419 but not YAC128 boutons, consistent with this idea.

420

421

#### 422 **Action potential-dependent glutamate release is suppressed due to presynaptic ER depletion**

423

424 Regardless of genotype, striking differences were seen in the rSyph-GCaMP6m signals that  
425 predominated in the presence versus absence of TTX. Most rSyph-GCaMP6m-expressing boutons  
426 in the absence of TTX showed numerous spontaneous events during standard 3 min imaging  
427 sessions. However, only subsets of boutons were spontaneously active in TTX, with active boutons  
428 characterized by higher resting cytosolic  $\text{Ca}^{2+}$  concentrations. Furthermore, although  $\text{Ca}^{2+}$  events  
429 at individual boutons in TTX were less frequent, they lasted many times longer than corresponding  
430 action potential-dependent events. Interestingly in the absence of TTX, subsets of boutons of both  
431 genotypes showed longer-lasting  $\text{Ca}^{2+}$  events, like those that persisted in TTX, typically alongside  
432 faster action potential-dependent events. We suspect these boutons correspond to the population  
433 spontaneously active in TTX. Event frequencies in such boutons, in the absence of TTX, were  
434 significantly lower than in boutons lacking these longer-lasting events, further supporting the idea

435 that subsets of cortical boutons favor either miniature or action potential-dependent glutamate  
436 release.

437

438 Although spontaneous axonal  $\text{Ca}^{2+}$  events were more common in YAC128 cultures in the presence  
439 of TTX, the opposite was true when experiments were performed without TTX, suggesting  
440 reduced activity-dependent glutamate release in YAC128 cultures. Reduced action potential-  
441 dependent axonal  $\text{Ca}^{2+}$  event frequencies in YAC128 cultures could reflect decreased CPN firing  
442 rates, altered transduction of sodium action potentials to bouton  $\text{Ca}^{2+}$  signals or some combination  
443 of these factors. 5  $\mu\text{M}$  ryanodine significantly reduced the frequency of these action potential-  
444 dependent bouton  $\text{Ca}^{2+}$  events in WT cultures, though not to YAC128 levels, consistent with  
445 reduced action potential-dependent presynaptic  $\text{Ca}^{2+}$  signaling in YAC128 cultures being partly,  
446 but not entirely mediated, by spontaneous release of ER  $\text{Ca}^{2+}$ . However, nuances of ryanodine's  
447 pharmacology may have confounded this conclusion. Low dose ryanodine opens ryanodine  
448 receptors, but to a sub-maximal conductance state. Furthermore, ryanodine binding to a second  
449 low affinity receptor site mediates channel closure, an action that predominates at doses greater  
450 than 10  $\mu\text{M}$ . Caffeine more effectively releases ER  $\text{Ca}^{2+}$ , exemplified here in patch clamp mini  
451 EPSC experiments, and may therefore have been capable of lowering action potential-dependent  
452 event frequencies in WT to YAC128 levels. Unfortunately, caffeine was undesirable for these  
453 experiments because, unlike ryanodine, it is an antagonist at adenosine receptors, which are often  
454 expressed at presynaptic sites and inhibit VGCCs (Dunwiddie & Masino, 2001). We speculate that  
455 the ryanodine receptor population in YAC128 boutons favors the open conformation under basal  
456 conditions, consistent with the lack of caffeine responses in YAC128 boutons, and that under such  
457 conditions, ryanodine-mediated channel closure would be exaggerated. If so, this could account

458 for the modest, but significant ryanodine-mediated increase in event frequencies in YAC128  
459 boutons.

460

461 Precise mechanism(s) by which pharmacological or disease-mediated ER Ca<sup>2+</sup> release might  
462 reduce activity-dependent presynaptic Ca<sup>2+</sup> signaling remain uncertain. Indeed axonal or cell body  
463 ER stores could equally underlie this effect given the dependence of these signals on sodium action  
464 potentials. Dendritic ryanodine receptor activation has been shown to reduce neuronal firing rates  
465 via activation of a Ca<sup>2+</sup>-dependent K<sup>+</sup> conductance (van de Vrede, Fossier, Baux, Joels, &  
466 Chameau, 2007). Alternatively, elevated cytosolic Ca<sup>2+</sup> levels in YAC128 boutons (mediated by  
467 the release of axonal stores) might contribute to Ca<sup>2+</sup>-dependent VGCC inactivation, thereby  
468 reducing the coupling of cortical action potentials to presynaptic VGCC-mediated Ca<sup>2+</sup> influx.  
469 Indeed, more generalized increases in cytosolic Ca<sup>2+</sup> mediated by ER store release, have been  
470 shown to facilitate Ca<sup>2+</sup>-dependent inactivation of voltage-gated Ca<sup>2+</sup> channels including the N  
471 and P/Q-types commonly expressed in presynaptic terminals and implicated in vesicular release  
472 (Budde, Meuth, & Pape, 2002; Cens, Rousset, Leyris, Fesquet, & Charnet, 2006). If this were the  
473 case in our system, the higher resting Ca<sup>2+</sup> concentrations evident in YAC128 boutons would be  
474 expected to maintain local voltage-gated Ca<sup>2+</sup> channels in a higher resting state of inactivation.

475

476 Low-dose ryanodine decreased the amplitude of striatum, glutamate-mediated iGluSnFR signals  
477 in WT brain slices, an effect absent or diminished in YAC128 slices, consistent with our findings  
478 in culture. There is a lack of consensus as to whether single action potentials can trigger Ca<sup>2+</sup>-  
479 induced Ca<sup>2+</sup> release from the presynaptic ER (Emptage et al., 2001), or whether prolonged,  
480 repetitive action potential firing is required (de Juan-Sanz et al., 2017). It seems unlikely that the

481 stimulation protocol used here appreciably contributed to the action potential-dependent discharge  
482 of the presynaptic ER, given the relatively low intensity stimulation used (repeated only twice at  
483 100 Hz). Rather, we suspect a ryanodine-mediated increase in presynaptic  $\text{Ca}^{2+}$  decreased evoked  
484 glutamate release by inactivating presynaptic voltage-gated  $\text{Ca}^{2+}$  channels in WT slices, and that  
485 this process was occluded in YAC128 slices. However, future studies will be required to clarify  
486 mechanistic details of this process.

487

488 Taken together, the evidence presented here strongly suggests enhanced spontaneous release of  
489 presynaptic ER  $\text{Ca}^{2+}$  in YAC128 mice favors miniature glutamate release at the expense of evoked  
490 release.

491

#### 492 **Implications for postsynaptic signaling**

493 Mini glutamate release elicits postsynaptic NMDA receptor-mediated  $\text{Ca}^{2+}$  influx under  
494 physiologically relevant conditions (Beaulieu-Laroche & Harnett, 2018; Espinosa & Kavalali,  
495 2009) and can mediate postsynaptic signaling distinct from that of action potential-dependent  
496 release (Sutton, Taylor, Ito, Pham, & Schuman, 2007). Indeed mini glutamate release may activate  
497 distinct populations of NMDAR receptors (Atasoy et al., 2008). In cultures, it was reported that  
498 miniature glutamate-mediated events become toxic to CPNs following prolonged silencing of  
499 neuronal activity with TTX (Fishbein & Segal, 2007). Future studies will be necessary to  
500 determine if and how the increased mini glutamate release shown here interacts with the well  
501 described alterations in postsynaptic NMDA receptor expression in the YAC128 and other HD-  
502 models, and whether a shift towards activity-independent glutamate release contributes to  
503 neurodegeneration in HD.

504

505 **Materials and Methods**

506

507 **Culture preparation:**

508

509 All animal-related procedures were approved by and adhered to the guidelines of the University  
510 of British Columbia Committee on Animal Care and the Canadian Council on Animal Care  
511 (protocols A17-0295, A15-0069 and A19-0076). Cultures were prepared from both male and  
512 female embryonic day 17-18 pups from either wild-type (WT) FVB/N or transgenic yeast artificial  
513 chromosome-containing mice expressing the full-length human huntingtin genomic DNA with 128  
514 CAG repeats (YAC128). YAC128 mice were maintained on the FVB/N background (homozygous  
515 line 55). Wildtype and YAC128 mice used for ex vivo slice experiments (below) and bred for  
516 culture preparation (above) were group housed under controlled conditions, free of known  
517 pathogens, at room temperature (22 – 24 °C), under a 12 hr light/dark cycle. Cortical cultures used  
518 in patch clamp electrophysiology and Ca<sup>2+</sup>-imaging experiments were prepared as previously  
519 described (Milnerwood et al., 2012; Smith-Dijak et al., 2019) and plated at a density of 225, 000  
520 neurons/ml. In a subsets of experiments, a portion of the total 2.7 million cortical neurons (plated  
521 per 24-well culture) were transfected with transgenic reporters including: GFP; a synaptophysin-  
522 tagged GCaMP6-M construct (a generous gift from Dr. Anne Marie Craig, UBC); a postsynaptic  
523 density 95 (PSD-95)-tagged M-cherry construct; or a GFP-tagged internally expressed anti-  
524 PSD95 antibody (a generous gift from Dr. D.B. Arnold, University of Southern California; (Gross  
525 et al., 2013)).

526

527

528 **Electrophysiology:**

529

530 An Axopatch 200B amplifier and pClamp 9.2 software (Molecular Devices, Sunnyvale, CA) were  
531 used to acquire whole-cell patch clamp electrophysiology recordings. Data was digitized at 20 kHz  
532 and low-pass filtered at 1 kHz. For electrophysiology experiments, cultures were perfused with  
533 extracellular fluid (ECF) containing (in mM): 167 NaCl, 2.4 KCl, 10 glucose, 10 HEPES, 2 CaCl<sub>2</sub>  
534 and 1 MgCl<sub>2</sub>; NaOH (1 mM) was used to adjust the pH to 7.30, and the osmolarity was adjusted  
535 to 305 – 310 mOsm. Tetrodotoxin (TTX) (500 nM) and picrotoxin (PTX) (50 μM) were added to  
536 this ECF to block sodium channel-mediated action potentials and GABA<sub>A</sub> receptor-mediated  
537 currents respectively. Neurons were patched with borosilicate glass pipettes pulled to a tip  
538 resistance of 3-6 MΩ when back-filled with intracellular solution containing in (mM): 130 Cs-  
539 methanesulfonate, 5 CsCl, 4 NaCl, 1 MgCl, 10 HEPES, 5 EGTA, 5 QX-314 Cl, 0.5 Na-GTP, 10  
540 Na-phosphocreatine, and 5 Mg-ATP (~286 mOsm). During experiments, neurons were held at –  
541 70 mV in voltage-clamp, with hyperpolarizing voltage steps (-10 mV) performed periodically to  
542 measure intrinsic membrane properties. Under these conditions AMPA receptor-mediated  
543 miniature excitatory postsynaptic currents (mEPSC)s appeared as transient inward current  
544 deflections. Recordings with a series resistance greater than 25 MΩ were excluded from analysis;  
545 typical values were between 15 – 20 MΩ. A minimum of 2 minutes following establishment of the  
546 whole cell configuration was allowed before experimental measurements, so neurons could fully  
547 dialyze with intracellular solution and achieve a stable membrane resistance and holding current.  
548 For experiments involving within-cell drug applications, a maximum 20 % change in series  
549 resistance between control and drug measurements was tolerated. In these cases, drugs were



550 applied locally to the neuron with a fast perfusion system. Mini Analysis software (Synaptosoft)  
551 was used to detect mEPSCs and extract relevant parameters. A minimum of 100 and no more than  
552 1000 mEPSC's were analyzed per neuron per experimental condition.

553

#### 554 **Cortical pyramidal neuron morphology:**

555

556 Cortical pyramidal neurons (CPN)s in WT and YAC128 cultures were labeled by transfecting a  
557 subset of neurons (1 of 2.7 million) with a cytoplasmic green fluorescent protein (GFP)  
558 (Addgene plasmid 37825) at the time of plating. Cultures were subsequently fixed at DIV17 - 19  
559 and GFP-labeled CPN dendritic arbors imaged on a Zeiss Axiovert 200 M fluorescence  
560 microscope (20 x magnification, 0.8 NA), with a Zeiss 702 monochrome camera, using Zen  
561 software. Multiple image Z-stacks were acquired and X,Y-tiling was used to ensure entire dendritic  
562 arbors were visualized. Images were exported to Fiji-ImageJ for analysis by a blinded observer.  
563 Images were flattened using the maximum Z-projection function. Background subtraction was  
564 performed, and neuronal processes were thresholded following adjustment of brightness and  
565 contrast. Automated Sholl analysis was performed using the ImageJ sholl analysis plugin.

566

#### 567 **Excitatory cortical synapse staining:**

568

569 A subset of neurons (2 of 2.7 million) in WT and YAC128 cortical cultures were transfected with  
570 a GFP-tagged internally-expressed anti-PSD95 antibody (intrabody) (Gross et al., 2013) at the time  
571 of plating. At DIV17 – 19, cells were fixed and stained for VGlut1 and the GluA2 AMPA receptor  
572 subunit as previously described (Buren et al., 2016). Briefly, cultures were first live-stained with

573 a primary mouse anti-GluA2 antibody (Millipore), then fixed and stained with a secondary Alexa  
574 Fluor 568-conjugated donkey anti-mouse antibody (Invitrogen). Subsequently, cultures were  
575 incubated with a primary guinea pig anti-VGlu1 antibody (Millipore), then stained with a  
576 secondary AMCA-conjugated donkey anti-guinea pig antibody (Jackson Immuno Research  
577 Laboratories). To amplify the GFP fluorescence of the anti-PSD95 intrabody, cultures were also  
578 incubated with a primary chicken anti-GFP antibody (1:1000) (Millipore), followed by an  
579 secondary Alexa Fluor 488-conjugated antibody (1:500) (Invitrogen). Cultures were imaged on a  
580 Zeiss Axiovert 200 M fluorescence microscope (63 x magnification, 1.4 NA), using a Zeiss 702  
581 monochrome camera and Zen software. CPNs expressing the anti-PSD95 intrabody were  
582 identified based on their diffuse cytoplasmic GFP fill, with bright GFP-labelled puncta expressed  
583 at dendritic spines. A portion of each CPNs arbor, containing multiple secondary and tertiary  
584 dendrites, was selected for imaging and sufficient image Z-stacks were acquired to adequately  
585 capture all dendritic processes present in a given 63x field. Images were exported to Fiji-ImageJ  
586 for analysis by a blinded observer and flattened using the maximum Z-projection function. For  
587 each CPN image, the GFP channel was used to identify 3 secondary or tertiary dendritic segments,  
588 at least 40  $\mu\text{m}$  away from the CPN soma, over which ROIs were drawn. Following background  
589 subtraction, fluorescent puncta in the green (GFP), red (Alexa Fluor 568) and blue (AMCA)  
590 channels, visible within dendritic ROIs, were manually thresholded and detected with the analyze  
591 particles function. The ImageJ colocalization plugin was used to identify triple-colocalized puncta  
592 (PSD95, GluA2 and VGlu1), which we interpreted as functional CPN glutamatergic synapses.  
593 Synapse density was defined as the number of triple-colocalized puncta present within a dendritic  
594 segment divided by the area of the segment and averaged across all 3 dendrites analyzed in a given  
595 CPN.

596

597 **Synaptophysin-GCaMP imaging:**

598

599 To directly image cytosolic Ca<sup>2+</sup> in axonal boutons of neurons in our cortical mono cultures we  
600 transfected 1 million cells (of a total 2.7 million) at time of plating with a rat synaptophysin-tagged  
601 GCaMP6-M construct (rSyph-GCaMP6m). The rSyph-GCaMP6m construct was created by fusing  
602 GCaMP6-M (T.-W. Chen et al., 2013) with the full length rat synaptophysin protein (1 – 307  
603 amino acids) via a small glycine-serine linker and inserting the fused rSyph-GCaMP6-M construct  
604 into a pLL3.7-hSyn vector to achieve neuron-selective expression. For some experiments, the same  
605 1 million cells were also transfected at time of plating with an M-cherry-tagged PSD95 construct;  
606 in these cases, rSyt-GCaMP6m-expressing presynaptic boutons that colocalized with M-Cherry  
607 labeled postsynaptic spines were presumed to be functional synapses.

608

609 For all Ca<sup>2+</sup>-imaging experiments, cultures were plated on 8-well cover-glass chambers (Thermo  
610 Scientific™, Nunc™, Lab-Tek™) and imaged at DIV (17 - 19) with a Zeiss Axiovert 200 M  
611 fluorescence microscope (63 x magnification, 1.4 NA), using a Zeiss 702 monochrome camera  
612 and Zen software. Movies were acquired at 10 Hz (100 ms exposure per frame) using the Zen  
613 time-series mode with camera-steaming enabled. These experiments were performed in standard  
614 ECF (as above) with or without TTX (500 nM) present, but in the absence of PTX.

615

616 Spontaneous Ca<sup>2+</sup> waves were commonly observed in rSyph-GCaMP6m-labelled axons, evident  
617 particularly when action potential-dependent Ca<sup>2+</sup> events were blocked with TTX. Automatically  
618 detecting such Ca<sup>2+</sup> waves proved difficult with algorithms commonly used to quantify activity-

619 related neuronal GCaMP signals. We therefore used the Astrocyte Quantitative Analysis (AQuA)  
620 software (running in MATLAB) (Y. Wang et al., 2019) to quantify these waves in the presence of  
621 TTX. AQua does not rely on spatially segmenting a  $\text{Ca}^{2+}$  movie into ROIs based on neuronal  
622 morphology, but rather defines events as spatially and temporally connected  $\text{Ca}^{2+}$  signals  
623 surpassing user-defined thresholds. This means spontaneous axonal waves spreading across  
624 multiple boutons are typically classified as a single event, because such  $\text{Ca}^{2+}$ -activity is grouped  
625 in time and space. Conversely, a given bouton can be involved in multiple axonal waves and thus  
626 detected as part of multiple events, as long as the pertinent signals are sufficiently temporally  
627 separated. To compare the frequency of aQua-detected spontaneous axonal events between  
628 genotypes and under pharmacological manipulations, we counted numbers of events occurring  
629 within a standardized area [ $178.6 \mu\text{m} \times 113.1 \mu\text{m}$  (a maximal 63 x field of view)], during a  
630 standardized (3 min) consecutive imaging interval. The same aQua detection parameters,  
631 empirically determined to best match a small number of manually analyzed experiments, were  
632 applied across all cultures and conditions analyzed to facilitate meaningful comparisons.

633

634 In a subset of experiments conducted in the presence of TTX, responses of individual WT or  
635 YAC128 rSyph-GCaMP6m-labelled synaptic boutons to caffeine or ionomycin were measured. In  
636 these experiments culture fields were imaged for 3 min (as above), after which caffeine (1 mM) or  
637 ionomycin (10  $\mu\text{M}$ ) was applied and imaging continued for an additional 1-2 min. aQua was not  
638 used to analyze these experiments, as an ROI-based algorithm was desired. For caffeine  
639 applications, an analyzer (blinded to culture genotype) used Fiji-ImageJ (NIH) to manually assign  
640 elliptical ROIs to 10 boutons per movie and exported each ROI's fluorescence-intensity time-  
641 course. Time-courses were subsequently imported to MATLAB, where the curve fitting tool was

642 used to model each time-course's photobleaching profile based on the initial 3 min recording; this  
643 curve was then extrapolated to the entire time-course including caffeine treatment. The resultant  
644 "bleaching curve" was subtracted from the raw rSyph-GCaMP6m fluorescence curve and this  
645 time-course subsequently divided by the "bleaching curve" to yield a final curve reflecting the  
646 caffeine response in DF/F units. Ionomycin experiments were analyzed similarly, except in this  
647 case, the blinded analyzer selected 10 active-boutons (showing at least 1 clear Ca<sup>2+</sup> event during  
648 the initial 3 min recording) and 10 inactive-boutons (with no Ca<sup>2+</sup> events present during the initial  
649 3 min recording). Time-courses derived from inactive-boutons were exported to MATLAB, where  
650 the ionomycin-mediated DF/F responses were calculated as above. In the case of active-boutons,  
651 spontaneous events occurring during the first 3 min were detected with MATLAB's findpeaks  
652 function and excised from the raw fluorescence time-courses before curve fitting, but otherwise  
653 processed as above.

654  
655 As expected, spontaneous events were far more frequent when rSyph-GCaMP6m -expressing  
656 cultures were imaged in the absence of TTX. Most boutons showed many events during a 3 min  
657 imaging session. These events, which were presumably driven by the action potential-dependent  
658 opening of voltage-gated Ca<sup>2+</sup> channels, were far shorter in duration than typical TTX-resistant  
659 events. To assess for genotype differences in these signals, a blinded analyzer used Fiji-ImageJ to  
660 randomly assign elliptical ROIs to 20 boutons per movie and exported each ROI's fluorescence-  
661 intensity time-course to MATLAB. The high frequency of action potential-dependent events often  
662 precluded extracting the photobleaching profile of a bouton's time-course, necessitating an  
663 alternative means of calculating the DF/F values of spontaneous events. We therefore averaged  
664 the grey-value fluorescence intensity across an entire-time course, subtracted this average

665 fluorescence pointwise from the time-course, then divided pointwise by the average fluorescence  
666 to convert to DF/F units. Any nonstationary present in these DF/F time-series due to  
667 photobleaching was removed with the MATLAB detrend function. The MATLAB findpeaks  
668 function was subsequently used to detect events in these DF/F traces and extract relevant  
669 parameters including peak event DF/F amplitudes and event half-amplitude widths. Bouton event  
670 frequencies were calculated by dividing numbers of detected events in a DF/F trace by the imaging  
671 interval. Bouton event frequencies and event parameters in the absence of TTX were compared  
672 between WT and YAC128 cultures under baseline conditions and following application of  
673 ryanodine (5  $\mu$ M).

674

#### 675 **iGluSnFR imaging in acute brain slices:**

676

677 Expression of the genetically-encoded intensity-based glutamate-sensing fluorescence reporter  
678 (iGluSnFR) (Marvin et al. 2013) in WT and YAC128 mice was achieved with stereotaxic injection  
679 of a viral construct as described previously (Parsons et al., 2016). Briefly, under isoflurane  
680 anesthesia, 1 – 1.4  $\mu$ l of the AAV1.hSyn.iGluSnFr.WPRE.SV40 construct (Penn Vector Core; Dr.  
681 Loren Looger, Janelia Farm Research Campus of the Howard Hughes Medical Institute) was  
682 directly injected into the dorsal striatum of 4 – 6 week old mice. Following surgery, mice were  
683 closely monitored for a week to ensure adequate recovery.

684

685 After waiting 3 – 6 weeks, to ensure optimal iGluSnFR expression, acute brain slices from 2-3  
686 month-old YAC128 mice and age-matched WT controls were prepared as described previously  
687 (Parsons et al., 2016; Koch et al., 2018). Briefly, mice were decapitated following deep

688 isoflurane anesthesia and their brains rapidly removed and placed in an ice-cold slicing solution,  
689 bubbled with carbogen (95% O<sub>2</sub>, 5% CO<sub>2</sub>) gas, containing (in mM): 125 NaCl, 2.5 KCl, 25  
690 NaHCO<sub>3</sub>, 1.25 NaH<sub>2</sub>PO<sub>4</sub>, 2.5 MgCl<sub>2</sub>, 0.5 CaCl<sub>2</sub>, and 10 glucose. 300 μm thick striatum-containing  
691 sagittal brain slices were cut with a Leica VT1200S vibratome. Slices were subsequently incubated  
692 for 30 min in warmed artificial cerebral spinal fluid ACSF containing 2 mM CaCl<sub>2</sub> and 1 mM  
693 MgCl<sub>2</sub>; ACSF constituents and concentrations were otherwise identical to the slicing solution  
694 (above).

695

696 Slices were transferred to a submerged recording chamber for experiments and perfused with  
697 carbogen-bubbled ACSF at a rate of 2 – 3 ml/min at room temperature. Cortical release of  
698 glutamate into the striatum was evoked by delivering paired 0.1 ms electrical pulses at 100 Hz  
699 with an A-M Systems isolated pulse stimulator (Model 2100) and tungsten monopolar stimulating  
700 electrode (tip resistance - 0.1 MΩ). The electrode was placed into a corpus callosum segment  
701 adjacent to the dorsal striatum at an approximate 50 – 100 μm depth. During and immediately prior  
702 to the electrical stimulation, iGluSnFR fluorescence was excited with a 470 nm LED; slices were  
703 not illuminated between experimental measurements to minimize phototoxicity and bleaching.  
704 Stimulation and LED activation were triggered by Clampex software (Molecular Devices,  
705 Sunnyvale, CA). iGluSnFR fluorescence was isolated with a 530 nm bandpass filter and imaged  
706 with a CCD camera (1 M60, Pantera, Dalsa) and XCAP software (Epix, inc.) at 150 Hz with 8 x  
707 8-pixel binning. Experimental measurements encompassing four stimulation trials and two blank  
708 trial were performed at 3-minute intervals. The four stimulation trials were averaged and the blank  
709 trials, in which slice-fluorescence was imaged without electrical stimulation, were averaged and  
710 used to account for photobleaching and to calculate the stimulation mediated changes in iGluSnFR

711 fluorescence over basal fluorescence ( $\Delta F/F$ ) as described previously (Parsons et al., 2016).  
712 Videos were analyzed offline with ImageJ software. The average iGluSnFR signal was measured  
713 over 10 x 10-pixel (93.8 x 93.8  $\mu\text{M}$ ) region of interested (ROI) placed over the maximal area of  
714 evoked iGluSnFR activity within the striatum adjacent to the stimulating electrode.

715

### 716 **Experimental design and statistical analysis:**

717

718 Statistical analysis and creation of figures was performed using GraphPad Prism (version 7). All  
719 data distributions were tested for normality with the D'Agostino-Pearson omnibus normality test.

720

721 The Student's unpaired t-test was used for unpaired comparisons between two data groups, such  
722 as when mean mEPSC frequencies were compared between WT and YAC128 neurons, as long  
723 both data groups were normally distributed. When one or both groups failed the D'Agostino-  
724 Pearson omnibus normality test, the non-parametric Mann Whitney test was used instead.

725

726 When parameters of the same group of neurons or axonal boutons were compared before and after  
727 a drug treatment, statistical significance was assessed with the Student's paired t-test, unless data  
728 points in the control or drug-treatment group failed the D'Agostino-Pearson omnibus normality test;  
729 in which case, the non-parametric Wilcoxon matched-pairs signed rank test was used instead.

730

731 A two-way ANOVA with the Bonferroni post-test was used when testing for genotype differences  
732 in a dependent variable measured at different time points, as was the case for our brain-slice  
733 iGluSnFR experiments.



734

735 Depending on the experimental design, “n” numbers in figures refer either to number of neurons,  
736 numbers of imaged culture fields, numbers of individual axonal boutons, or numbers of brain  
737 slices. Clarifying details are present within individual figure legends, as are the numbers of culture  
738 batches or mice used.

739

740 Differences in mean values were considered significant at  $p < 0.05$ , and significance levels are  
741 indicated in figures as follows: \* $p < 0.05$ , \*\* $p < 0.01$ , \*\*\* $p < 0.001$ , \*\*\*\* $p < 0.0001$ . Comprehensive  
742 descriptions of statistical analysis are included in figure legends.

743

#### 744 **Acknowledgments**

745

746 We thank Dr. Anne Marie Craig (UBC) for expert advice on experiments using rSypH-GCaMP6m,  
747 and Dr. Lily Zhang and Dr. Rujun Kang for technical support and assistance. The work was  
748 supported by funding from the Canadian Institutes of Health Research (CIHR) Foundation grants  
749 FDN-143210 to LAR and FDN-154278 to MRH. CB was supported by a University of British  
750 Columbia 4-year Graduate Fellowship (UBC 4-YF). ASD was supported by a CIHR Canada  
751 Graduate Scholarship Doctoral award and a UBC 4-YF. EK was supported by a CIHR Canada  
752 Graduate Scholarship Master’s award and UBC 4-YF. MES was supported by a Vanier Canada  
753 Graduate Scholarship and a UBC 4-YF. WN was supported by a UBC-CIHR-MD/PhD studentship  
754 and a Vanier Canada Graduate Scholarship. LAR holds the UBC Department of Psychiatry Louise  
755 A. Brown Chair in Neuroscience. MRH holds a Canada Research Chair.

756

757

758 **Declaration of Interests**

759

760 The authors declare no competing interests.

761

762

763

764

765

766

767

768

769

770

771

772

773

774

775

776

777

778

779

780 **Figure legends:**

781

782 **Fig 1: YAC128 cortical cultures show elevated miniature EPSC frequencies at early DIV**  
783 **time points.**

784 Representative traces (**A, D, G, J**) and population data for mEPSCs (frequency in **B, E, H, K**;  
785 amplitude in **C, F, I, L**) recorded from WT and YAC128 CPNs. All recordings were made in  
786 voltage clamp with a holding potential of -70mV in solution containing TTX (500 nM) and PTX  
787 (50  $\mu$ M).

788 **A – C:** Recordings made from CPNs in DIV-7 cultures. Mean mEPSC frequency (**B**) was  $1.8 \pm$   
789  $0.3$  Hz (n=18; 3 cultures) in WT CPNs and  $2.8 \pm 0.7$  Hz (n=17; 4 cultures) in YAC CPNs; this  
790 difference was not statistically significantly [t(33)=1.449; p=0.1567; Student's unpaired-t test].  
791 Mean mEPSC amplitudes (**C**) were similar in WT and YAC128 cultures:  $17.2 \pm 1.5$  pA (n=18; 3  
792 cultures) and  $17.0 \pm 1.7$  pA (n=17; 4 cultures) respectively [t(33)=0.06936; p=0.9452; Student's  
793 unpaired-t test].

794 **D - F:** Recordings were made from CPNs in DIV-14 cortical cultures. Mean mEPSC frequency  
795 (**E**) was significantly higher in YAC128 CPNs [ $10.8 \pm 1.8$  Hz (n=20; 6 cultures)] compared to WT  
796 CPNs [ $4.4 \pm 2.6$  Hz (n=22; 4 cultures)], [t(40)=3.555; p=0.0010; Student's unpaired-t test]. Mean  
797 CPN mEPSC amplitudes (**F**) were not significantly different in WT and YAC128 cultures:  $12.1 \pm$   
798  $0.8$  pA (n=22; 4 cultures) and  $15.0 \pm 1.4$  pA (n=20; 6 cultures), respectively [t(40)=1.807;  
799 p=0.0786; Student's unpaired-t test].

800 **G – I:** Recordings were made from CPNs in DIV-18 cortical cultures. Mean CPN mEPSC  
801 frequency (**H**) was significantly higher in YAC128 cortical cultures [ $14.1 \pm 1.2$  Hz (n=38; 10  
802 cultures)] compared to WT cultures [ $9.9 \pm 1.5$  Hz (n=30; 15 cultures)], [p<0.0059 (exact); Mann

803 Whitney test]. Mean CPN mEPSC amplitudes (**I**) were similar in WT and YAC128 cultures: 17.0  
804  $\pm 1.8$  pA (n=30; 15 cultures) and  $17.4 \pm 1.8$  pA (n=38; 10 cultures) respectively [p=0.8643 (exact);  
805 Mann Whitney test].

806 **J – L:** Recordings were made from CPNs in DIV-21 cortical cultures. Mean CPN mEPSC  
807 frequency (**K**) was similar in WT and YAC128 cultures:  $14.2 \pm 1.2$  Hz (n=62; 17 cultures) and  
808  $14.0 \pm 0.9$  Hz (n=71, 23 cultures), respectively [p=0.5626 (exact); Mann Whitney test]. Mean CPN  
809 mEPSC amplitudes (**L**) were similar in WT and YAC128 cultures:  $22.3 \pm 1.3$  pA (n=62; 17  
810 cultures) and  $24.3 \pm 1.2$  pA (n=71; 23 cultures), respectively [p=0.2143 (exact); Mann Whitney  
811 test].

812

813 **Supplemental Fig 1: Dendritic complexity and excitatory synapse numbers are similar in**  
814 **WT and YAC128 cortical cultures.**

815 **A, B.** Representative images generated by thresholding a merged Z-stack of a green fluorescent  
816 protein (GFP)-expressing WT CPN (**A**) and YAC128 CPN (**B**).

817 **C.** Number of dendritic intersections through concentric sholl circles centered on the soma of GFP-  
818 filled WT and YAC128 CPNs of radii between 10  $\mu$ m and 450  $\mu$ m. WT and YAC128 CPNs have  
819 nearly identical dendritic branching distributions [2-way ANOVA; Genotype: F(1, 6165)= 1.168,  
820 p<0.2799; Distance from soma: F(44, 6165)=381.6, p<0.0001; Interaction: F(44, 6165)=0.9868,  
821 p<0.4966].

822 **D.** Total numbers of sholl intersections, which reflect general neuronal complexity, were similar  
823 in WT and YAC128 CPNs:  $254.0 \pm 8.8$  (n=61; 4 cultures) and  $249.5 \pm 8.7$  (n=78; 4 cultures)  
824 respectively [p=0.7263 (exact); Mann Whitney test].

825 **E.** A representative merged Z-stack from a WT CPN (left panels) and YAC128 CPN (right panels)  
826 with merged green, red and blue channels showing staining of a genetically-encoded internally-  
827 expressed GFP-tagged anti-PSD-95 antibody (green), anti AMPA receptor GluA2 subunit  
828 immuno-staining (red) and anti VGlut1 immuno-staining (blue) respectively. The bottom panel  
829 shows an expanded view of a segment of dendrite with arrows pointing to a subset of co-localized  
830 PSD-95, GluA2 and VGlut1 puncta, which were counted as presumed functional synapses. Note,  
831 for illustrative purposes the brightness and contrast of the individual channels were adjusted to  
832 best illustrate the punctate fluorescence.

833 **F.** Numbers of presumed functional synapses (identified as above) per  $100 \mu\text{m}^2$  of secondary and  
834 tertiary dendrites of WT and YAC128 CPNs:  $8.8 \pm 1.1$  (n=37; 2 cultures) and  $6.8 \pm 0.7$  (n=57; 3  
835 cultures), respectively. Although synapse numbers were lower in YAC128 cultures this did not  
836 reach statistical significance [ $p=0.1039$  (exact); Mann Whitney test].

837

838 **Fig 2: Spontaneous release of ER  $\text{Ca}^{2+}$  elevates YAC128 pyramidal neuron miniature EPSC**  
839 **frequencies.**

840 **A and B - Hypothetical model (tested below)** **A.** We hypothesize, in WT cultures, spontaneous  
841  $\text{Ca}^{2+}$  release from ER stores in presynaptic cortical terminals only minimally augments action  
842 potential-independent (mini) glutamate release. **B.** Conversely, in YAC128 cultures, we  
843 hypothesize spontaneous  $\text{Ca}^{2+}$  release from presynaptic ER stores is increased, and that this  
844 elevates  $\text{Ca}^{2+}$ -dependent, mini glutamate release.

845 **C – H:** Voltage clamp recordings were made at -70 mV from DIV-18 cultured WT (**C – E**) and  
846 YAC128 CPNs (**F – H**) in the presence of TTX (500 nM) and PTX (50  $\mu\text{M}$ ), under control  
847 conditions and during subsequent local ryanodine (5  $\mu\text{M}$ ) application. Note that in the

848 representative traces from the WT CPN (**C**), ryanodine (5  $\mu\text{M}$ ) substantially increased the mEPSC  
849 frequency, whereas the drug had little effect on the mEPSC frequency in the representative  
850 YAC128 CPN (**F**). Quantifying the population data revealed that ryanodine (5  $\mu\text{M}$ ) significantly  
851 increased the mean mEPSC frequency in WT cultured CPNs (**D**) from  $6.7 \pm 1.2$  Hz to  $11.9 \pm 2.4$   
852 Hz, [t(12)=2.50; p=0.0280; n=13; 8 cultures; Student's paired-t test]. Ryanodine (5  $\mu\text{M}$ ) did not  
853 significantly affect the mean WT CPN mEPSC amplitude (**E**) (control:  $21.0 \pm 3.2$  pA, ryanodine:  
854  $20.2 \pm 2.3$  pA), [t(12)=0.65; p=0.5278; n=13; 8 cultures; Student's paired-t test]. In YAC128  
855 cultures, ryanodine (5  $\mu\text{M}$ ) did not significantly affect the mean CPN mEPSC frequency (**G**)  
856 (control:  $12.0 \pm 1.7$  Hz, ryanodine:  $13.9 \pm 2.0$  Hz), [t(14)=1.65; p=0.1206; n=15; 4 cultures;  
857 Student's paired-t test]. Ryanodine (5  $\mu\text{M}$ ) also did not significantly affect the mean CPN mEPSC  
858 amplitude (**H**) (control:  $20.5 \pm 4.4$  pA, ryanodine:  $19.6 \pm 3.4$  pA), [t(14)=0.71; p=0.4904; n=15; 4  
859 cultures; Student's paired-t test].

860 **I.** Voltage clamp recordings from representative WT (top) and YAC128 (bottom) CPNs at -70 mV  
861 in the presence of TTX (500 nM) and PTX (50  $\mu\text{M}$ ) (as before), with the addition of CPA (30  $\mu\text{M}$ )  
862 and in the absence of extracellular  $\text{Ca}^{2+}$ . Note in all such recording, CPNs were incubated in this  
863 CPA-containing, 0 mM  $\text{Ca}^{2+}$  ECSF for a minimum of 10 min.

864 **J.** In CPA (30  $\mu\text{M}$ ) and in the absence of extracellular  $\text{Ca}^{2+}$ , mEPSCs were significantly less  
865 frequent in YAC128 CPNs [ $3.3 \pm 0.6$  Hz (n=14; 4 cultures)] compared WT CPNs [ $8.4 \pm 1.5$  Hz  
866 (n=17; 5 cultures)] under like conditions [t(29)=2.952; p=0.0062; Student's unpaired-t test].

867 **K.** In CPA (30  $\mu\text{M}$ ) and in the absence of extracellular  $\text{Ca}^{2+}$ , YAC128 CPNs showed a trend  
868 towards a lower mean mEPSC amplitude than in WT (WT:  $26.7 \pm 5.2$  pA, YAC128:  $16.1 \pm 3.3$

869 pA), but this did not reach statistical significance [ $t(27)=1.706$ ;  $p=0.0995$ ; Student's unpaired-t  
870 test].

871

872 **Supplemental Fig 2: Releasing ER Ca<sup>2+</sup> with caffeine increases the CPN mEPSC frequency**  
873 **in WT, but not YAC128, CPNs.**

874 Voltage clamp recordings were made from cultured WT and YAC128 CPNs at -70 mV in the  
875 presence of TTX (500 nM) and PTX (50  $\mu$ M), under control conditions and during subsequent  
876 local caffeine (1 mM) application.

877 **A, D:** Representative traces from WT (A) and YAC128 (D) CPNs, under control (top traces) and  
878 caffeine (bottom traces) conditions. In this CPN, caffeine (1 mM) substantially increased the  
879 mEPSC frequency.

880 **B.** Caffeine (1 mM) significantly increased the mean mEPSC frequency in WT cultured CPNs  
881 from  $12.3 \pm 2.5$  Hz to  $22.8 \pm 8.0$  Hz, [ $p=0.0076$  (exact);  $n=16$ ; 8 cultures; Wilcoxon matched-pairs  
882 signed rank test].

883 **C.** Caffeine (1 mM) did not significantly affect the mean WT CPN mEPSC amplitude (control:  
884  $13.7 \pm 1.9$  pA, caffeine:  $17.2 \pm 3.4$  pA), [ $p=0.8603$  (exact);  $n=16$ ; 8 cultures; Wilcoxon matched-  
885 pairs signed rank test].

886 **E.** In YAC128 CPNs, caffeine (1 mM) did not significantly affect the mean CPN mEPSC  
887 frequency (control:  $12.0 \pm 2.1$  Hz, caffeine:  $11.5 \pm 1.9$  Hz), [ $t(12)=0.4808$ ;  $p=0.6393$ ;  $n=13$ ; 5  
888 cultures; Student's paired-t test].

889 **F.** In YAC128 CPNs, caffeine (1 mM) also did not significantly affect the mean CPN mEPSC  
890 amplitude (control:  $14.5 \pm 1.4$  pA, caffeine:  $14.1 \pm 1.2$  pA), [ $t(12)=0.8086$ ;  $p=0.4345$ ;  $n=13$ ; 5  
891 cultures; Student's paired-t test].

892 **G.** Percent change in mEPSC frequency mediated by Caffeine (1 mM) application to WT and  
893 YAC128 CPNs (calculated from the responses in panels **B** and **E**). Caffeine (1 mM) elicited a  
894 significantly greater increase in the mEPSC frequency in WT, compared to YAC128, CPNs [WT:  
895  $99.2 \pm 34.1$  % (n=16; 8 cultures), YAC128:  $1.2 \pm 7.6$  % (n=13; 5 cultures)], [p=0.0025 (exact);  
896 Mann Whitney test].

897

898 **Fig 3: Axonal Ca<sup>2+</sup> waves are more frequent in YAC128 Cortical Cultures.**

899 **A.** Portion of a YAC128 rat synaptophysin-tagged GCaMP6-M (rSyph-GCaMP6m)-expressing  
900 axon during a spontaneous Ca<sup>2+</sup> wave in the presence of ECF containing TTX (500 nM). Images  
901 reflect raw GCaMP fluorescence values (arbitrary units) and comprise 15 s of a 4 min video. For  
902 illustrative purposes, images were binned temporally from the original 10 Hz movie, such that  
903 each 2 s frame reflects the average fluorescence of 20 successively acquired frames.

904 **B.** Time course of DF/F (change in fluorescence over basal fluorescence) values extracted from 3  
905 of the YAC128 rSyph-GCaMP6m-expressing axonal boutons (shown in panel **A** with color-coded  
906 arrows, panel labelled 15s). Signals were spatially averaged across elliptical regions of interest  
907 (ROI)s encompassing the indicated boutons and represent the entire 4 min imaging session. Note  
908 the multi-second delay in the propagation of signals between boutons and the long time course of  
909 individual events.

910 **C.** Representative 3 min DF/F time course from a WT rSyph-GCaMP6m-expressing axonal bouton  
911 in TTX (500 nM) (top). Note the substantially longer duration of this event compared to  
912 representative events recorded without TTX from a separate WT rSyph-GCaMP6m-expressing  
913 bouton (bottom).



914 **D.** Average half amplitude width of spontaneous  $\text{Ca}^{2+}$  events occurring in rSyph-GCaMP6m-  
915 expressing boutons in WT and YAC128 cortical cultures in the presence and absence of TTX (500  
916 nM). Select comparisons were made with the Mann Whitney test because event widths in all  
917 groups failed the D'Agostino-Pearson omnibus normality test. WT events were significantly longer  
918 with TTX [ $8.60 \pm 0.92$  s (n=164 events; 85 boutons; 4 cultures)] than without [ $1.06 \pm 0.97$  s  
919 (n=3725 events; 175 boutons; 4 cultures)] [ $p < 0.0001$  (approximate); Mann Whitney test].  
920 Likewise, YAC128 half widths were significantly longer with TTX [ $6.23 \pm 0.35$  s (n=440 events;  
921 153 boutons; 4 cultures)] than without [ $1.17 \pm 1.46$  s (n=5159 events; 422 boutons; 6 cultures)]  
922 [ $p < 0.0001$  (approximate); Mann Whitney test].

923 **E.** Numbers of detected spontaneous axonal events (as in Panels **A** and **B**) during 3 min recordings  
924 of 63 x objective ( $178.6 \mu\text{m} \times 113.1 \mu\text{m}$ ) fields imaged in the presence of TTX (500 nM). Action  
925 potential-independent events were significantly more frequent in YAC128 cortical cultures [ $115.9$   
926  $\pm 28.1$  events/3 min (n=15 fields; 4 cultures)], compared to WT [ $36.3 \pm 5.5$  events/3 min (n=12  
927 fields; 4 cultures)], [ $p = 0.0016$  (exact); Mann Whitney test].

928 **F.** Average peak DF/F amplitudes of all the spontaneous, action potential-independent axonal  $\text{Ca}^{2+}$   
929 events imaged in a given 63 x objective field over 3 min from WT and YAC128 cortical cultures.  
930 Average event amplitudes were not significantly different between WT [ $0.240 \pm 0.046$  DF/F (n=10  
931 fields; 4 cultures)] and YAC128 cultures [ $0.216 \pm 0.027$  DF/F (n=12 fields; 4 cultures)],  
932 [ $t(20) = 0.465$ ;  $p = 0.647$ ; Student's unpaired-t test].

933

934 **Fig 4: Boutons spontaneously active in TTX show relatively elevated cytosolic  $\text{Ca}^{2+}$  in both**  
935 **genotypes. Resting cytosolic  $\text{Ca}^{2+}$  concentrations are higher in the overall YAC128 bouton**  
936 **population.**

937 **A.** DF/F time courses from two rSyph-GCaMP6m-expressing axonal boutons from a  
938 representative YAC128 culture in the presence of TTX (500 nM). The first bouton (top trace) is  
939 inactive during the 3 min imaging session, while the second bouton (bottom trace) shows a clear  
940 spontaneous event (black arrow). Subsequent application of the Ca<sup>2+</sup> ionophore ionomycin (10  
941 μM) elicits a smaller Ca<sup>2+</sup> response in the spontaneously active bouton, suggesting a higher basal  
942 cytosolic Ca<sup>2+</sup> concentration (pre-ionomycin) in the active bouton.

943 **B,C:** Ionomycin responses of rSyph-GCaMP6m-expressing boutons in the presence of TTX  
944 following a 3 min imaging session in WT (**B**) and YAC128 (**C**) cultures. Boutons were classified  
945 as active or inactive based on the presence, or lack thereof, of at least one spontaneous Ca<sup>2+</sup> event  
946 during the initial 3 minute recording. Ionomycin responses were significantly larger in the  
947 population of inactive boutons [WT: 0.633 ± 0.072 DF/F (n=67 boutons); YAC128: 0.410 ± 0.040  
948 DF/F (n=51 boutons)], vs active boutons [WT: 0.191 ± 0.026 DF/F (n=41 boutons; 4 cultures),  
949 p<0.0001 (exact) by Mann Whitney test; YAC128: 0.149 ± 0.016 DF/F (n=46 boutons), p<0.0001  
950 (exact) by Mann Whitney test]. 4 cultures for WT and 4 cultures for YAC128.

951 **D, E:** Responses of rSyph-GCaMP6m-expressing axons from a representative WT (**D**) and  
952 YAC128 (**E**) cortical culture to ionomycin (10 μM). Images are from a 4 min imaging session,  
953 with ionomycin application at 3 min and reflect raw GCaMP fluorescence values (arbitrary units)  
954 (as above). To minimize impacts of photobleaching, the top (before) image is the frame  
955 immediately prior ionomycin. The bottom image is a maximum projection of all frames acquired  
956 30s prior and following ionomycin treatment and reflect each pixel's maximum ionomycin  
957 response. The visible grey-value dynamic range is the same in panels **D** and **E**, (150 increments of  
958 the total unprocessed 14 bit-depth), however the 0 value in **E** has been adjusted so that brightness

959 of the before image is comparable to that of its WT counterpart in **D**; this is so the reader can better  
960 appreciate the YAC128 culture's smaller relative change in fluorescence.

961 **F.** Ionomycin responses of the all WT and YAC128 rSyph-GCaMP6m-expressing axons  
962 automatically detected with the aQua software suite (see methods for reference). The WT bouton  
963 population showed a significantly greater ionomycin-mediated change in fluorescence [ $0.272 \pm$   
964  $0.006$  DF/F (n=1681 boutons; 4 cultures)] compared to the YAC128 population [ $0.190 \pm 0.002$   
965 DF/F (n=1462 boutons; 4 cultures)], [ $p < 0.0001$  (exact); Mann Whitney test].

966

967 **Fig 5: Caffeine increases the frequency of spontaneous  $Ca^{2+}$  events and the resting  $Ca^{2+}$**   
968 **concentration in WT, but not YAC128, cortical axonal boutons.**

969 **A, B:** Numbers of detected spontaneous rSyph-GCaMP6m axonal events in the presence TTX  
970 (500 nM) during 3 min recordings of 63 x objective fields of WT (**A**) and YAC128 (**B**) cortical  
971 cultures (as above). The control group consists of the same culture fields shown in **Figure 6: E**,  
972 and is compared to separate WT (**A**) or YAC128 (**B**) culture fields imaged in the presence of  
973 caffeine (1 mM) under otherwise like conditions. WT axons showed significantly more action  
974 potential-independent events in the presence of caffeine, than in its absence [ $203.8 \pm 55.2$  events/3  
975 min (n=10 fields; 5 cultures)] vs [ $36.3 \pm 5.5$  events/3 min (n=12 fields; 4 cultures)] respectively  
976 [ $t(20)=3.316$ ;  $p=0.0034$ ; Student's unpaired-t test]. Numbers of detected YAC128 axonal events  
977 were not significantly different in the presence or absence of caffeine [ $115.1 \pm 28.21$  events/3 min  
978 (n=15 fields; 4 cultures)] vs [ $150.0 \pm 28.55$  events/3 min (n=8 fields; 4 cultures)] respectively  
979 [ $p=0.2188$  (exact); Mann Whitney test].

980 **C.** DF/F time courses from representative WT (top) and YAC128 (bottom) rSyph-GCaMP6m-  
981 expressing axonal boutons in the presence of TTX (500 nM) before and immediately following

982 application of caffeine (1 mM). For this illustration, boutons were selected which did not show  
983 spontaneous events. Rather, note the gradual sustained increase in rSyph-GCaMP6m fluorescence,  
984 which is of larger magnitude in the WT bouton.

985 **D.** Caffeine responses of WT and YAC128 rSyph-GCaMP6m-expressing boutons in the presence  
986 of TTX as illustrated in panel C. Boutons showing spontaneous events (**as in Figure 6**) were  
987 excluded as the long time course of such events complicated quantification of steady-state  
988 increases in DF/F. Caffeine application elicited a significantly greater increase in rSyph-  
989 GCaMP6m fluorescence in WT boutons [ $0.342 \pm 0.030$  DF/F (n=87 boutons)] compared to  
990 YAC128 [ $0.229 \pm 0.039$  DF/F (n=54 boutons)] [ $p=0.0004$  (exact); Mann Whitney test]. For A, B  
991 and D: 5 cultures for WT and 5 cultures for YAC128.

992

993 **Fig 6: In the absence of TTX, presynaptic calcium events are more frequent in WT,**  
994 **compared to YAC128, cultures.**

995 **A, B:** DF/F time course from representative WT rSyph-GCaMP6m-expressing axonal boutons in  
996 the absence of TTX, under control conditions (A) and in presences of 5  $\mu$ M ryanodine (B). Note  
997 these are not the same boutons, as experiments illustrated in this figure were not paired.

998 **C, D:** DF/F time course from two different representative YAC128 rSyph-GCaMP6m-expressing  
999 axonal boutons in the absence of TTX, one under control conditions (C) and the other in the  
1000 presence of 5  $\mu$ M ryanodine. (D)

1001 **E:** Mean  $\text{Ca}^{2+}$  event frequencies of rSyph-GCaMP6m-expressing boutons in the absence of TTX  
1002 in WT and YAC128 cortical cultures in the presence and absence of ryanodine (5  $\mu$ M). Select  
1003 comparisons were made with the Mann Whitney test because event widths in all groups failed the  
1004 D'Agostino-Pearson omnibus normality test. Events were significantly more frequent in WT

1005 boutons [ $0.1424 \pm 0.0061$  Hz (n=272 boutons; 5 cultures)] than in YAC128 boutons [ $0.0761 \pm$   
1006  $0.0044$  Hz (n=423 boutons; 6 cultures)] [ $p < 0.0001$  (approximate); Mann Whitney test]. Events  
1007 were significantly less frequent in WT boutons with ryanodine ( $5 \mu\text{M}$ ) [ $0.1179 \pm 0.0033$  Hz (n=120  
1008 boutons, 3 cultures)] than without (above) [ $p = 0.0038$  (approximate); Mann Whitney test].  
1009 Conversely, event frequencies were significantly more frequent in YAC128 boutons with  
1010 ryanodine ( $5 \mu\text{M}$ ) [ $0.0886 \pm 0.0044$  Hz (n=189 boutons, 4 cultures)] than without (above)  
1011 [ $p = 0.0003$  (approximate); Mann Whitney test].

1012 **F, G:** DF/F time course from two representative rSyph-GCaMP6m-expressing axonal boutons  
1013 from the same WT culture field in the absence of TTX. Bouton (F) shows only faster events (lasting  
1014  $< 6$  s), while in bouton (G) a clear slow event (lasting  $> 6$  s) is present. Note the substantially lower  
1015 overall event frequency in (G).

1016 **H, I:**  $\text{Ca}^{2+}$  event frequencies of WT (H) and YAC128 (I) rSyph-GCaMP6m-expressing boutons  
1017 (as above), grouped based on the presence or absence of one or more slow events ( $> 6$  s at half  
1018 peak amp). (H): 23/292 (7.9 %) WT boutons showed at least one such slow event with an overall  
1019 mean bouton frequency of  $0.107 \pm 0.016$  Hz (n=23), significantly lower than WT boutons lacking  
1020 slower events [ $0.143 \pm 0.006$  Hz (n=269)] [ $p = 0.0058$  (exact); Mann Whitney test] (n=292 boutons,  
1021 5 cultures). (I) 44/423 (10.4 %) YAC128 boutons showed at least one such slow event with an  
1022 overall mean bouton frequency of  $0.052 \pm 0.005$  Hz (n=44), significantly lower than YAC128  
1023 boutons lacking slower events [ $0.076 \pm 0.004$  Hz (n=379)] [ $p = 0.0058$  (exact); Mann Whitney test]  
1024 (n=423 boutons, 6 cultures).

1025

1026 **Fig 7: Ryanodine reduces evoked striatal iGluSnR responses in WT, but not YAC128, brain**  
1027 **slices.**

1028 **A.** Image of raw iGluSnFR fluorescence from a representative WT mouse brain slice with viral-  
1029 mediated expression of iGluSnFR in its dorsal striatum. Note the square ROI over which evoked  
1030 spatially averaged DF/F signals were measured, and the tungsten monopolar stimulating electrode  
1031 placed in the corpus callosum.

1032 **B.** A DF/F image montage from the WT brain slice (shown in A), illustrating a striatum iGluSnFR  
1033 response evoked by electrically stimulating cortical axons in the adjacent corpus callosum.

1034 **C.** Striatum evoked DF/F iGluSnFR responses from a representative WT (top) and YAC128  
1035 (bottom) brain slice before and in the presence of ryanodine (5  $\mu$ M). Ryanodine elicits a substantial  
1036 reduction in the peak WT, but not YAC128, iGluSnFR response.

1037 **D.** Peak evoked striatum iGluSnFR responses from WT and YAC128 slices before and during  
1038 treatment of slices with ryanodine (5  $\mu$ M). Responses were measured repeatedly at 3 min intervals  
1039 and were normalized to the average of each slice's 3 baseline (before drug) measurements.  
1040 Ryanodine application decreased the amplitude of the evoked iGluSnFR response in WT (n=9  
1041 slices; 9 mice), but not YAC128 (n=8 slices; 8 mice). The effect of ryanodine on WT slices was  
1042 significantly different than in YAC128 slices, based on a significant time-genotype interaction  
1043 ( $p=0.0094$ , repeated measure (time) two way ANOVA).

1044

1045

1046

1047

1048 **References:**

1049

- 1050 A novel gene containing a trinucleotide repeat that is expanded and unstable on Huntington's  
1051 disease chromosomes. The Huntington's Disease Collaborative Research Group. (1993). A  
1052 novel gene containing a trinucleotide repeat that is expanded and unstable on Huntington's  
1053 disease chromosomes. The Huntington's Disease Collaborative Research Group. *Cell*, 72(6),  
1054 971–983.
- 1055 Atasoy, D., Ertunc, M., Moulder, K. L., Blackwell, J., Chung, C., Su, J., & Kavalali, E. T.  
1056 (2008). Spontaneous and evoked glutamate release activates two populations of NMDA  
1057 receptors with limited overlap. *The Journal of Neuroscience : the Official Journal of the*  
1058 *Society for Neuroscience*, 28(40), 10151–10166. [http://doi.org/10.1523/JNEUROSCI.2432-](http://doi.org/10.1523/JNEUROSCI.2432-08.2008)  
1059 08.2008
- 1060 Bachoud-Lévi, A.-C., Ferreira, J., Massart, R., Youssov, K., Rosser, A., Busse, M., et al. (2019).  
1061 International Guidelines for the Treatment of Huntington's Disease. *Frontiers in Neurology*,  
1062 10, 710. <http://doi.org/10.3389/fneur.2019.00710>
- 1063 Beal, M. F., Kowall, N. W., Ellison, D. W., Mazurek, M. F., Swartz, K. J., & Martin, J. B.  
1064 (1986). Replication of the neurochemical characteristics of Huntington's disease by  
1065 quinolinic acid. *Nature*, 321(6066), 168–171. <http://doi.org/10.1038/321168a0>
- 1066 Beaulieu-Laroche, L., & Harnett, M. T. (2018). Dendritic Spines Prevent Synaptic Voltage  
1067 Clamp. *Neuron*, 97(1), 75–82.e3. <http://doi.org/10.1016/j.neuron.2017.11.016>
- 1068 Botelho, E. P., Wang, E., Chen, J. Y., Holley, S., Andre, V., Cepeda, C., & Levine, M. S. (2014).  
1069 Differential Synaptic and Extrasynaptic Glutamate-Receptor Alterations in Striatal Medium-  
1070 Sized Spiny Neurons of Aged YAC128 Huntington's Disease Mice. *PLoS Currents*, 6.  
1071 <http://doi.org/10.1371/currents.hd.34957c4f8bd7cb1f5ec47381dfc811c3>
- 1072 Budde, T., Meuth, S., & Pape, H.-C. (2002). Calcium-dependent inactivation of neuronal  
1073 calcium channels. *Nature Reviews. Neuroscience*, 3(11), 873–883.  
1074 <http://doi.org/10.1038/nrn959>
- 1075 Buren, C., Parsons, M. P., Smith-Dijak, A., & Raymond, L. A. (2016). Impaired development of  
1076 cortico-striatal synaptic connectivity in a cell culture model of Huntington's disease.  
1077 *Neurobiology of Disease*, 87, 80–90. <http://doi.org/10.1016/j.nbd.2015.12.009>
- 1078 Cens, T., Rousset, M., Leyris, J.-P., Fesquet, P., & Charnet, P. (2006). Voltage- and calcium-  
1079 dependent inactivation in high voltage-gated Ca(2+) channels. *Progress in Biophysics and*  
1080 *Molecular Biology*, 90(1-3), 104–117. <http://doi.org/10.1016/j.pbiomolbio.2005.05.013>
- 1081 Cepeda, C., Hurst, R. S., Calvert, C. R., Hernández-Echeagaray, E., Nguyen, O. K., Jocoy, E., et  
1082 al. (2003). Transient and progressive electrophysiological alterations in the corticostriatal  
1083 pathway in a mouse model of Huntington's disease. *The Journal of Neuroscience : the*  
1084 *Official Journal of the Society for Neuroscience*, 23(3), 961–969.
- 1085 Chen, T.-W., Wardill, T. J., Sun, Y., Pulver, S. R., Renninger, S. L., Baohan, A., et al. (2013).  
1086 Ultrasensitive fluorescent proteins for imaging neuronal activity. *Nature*, 499(7458), 295–  
1087 300. <http://doi.org/10.1038/nature12354>
- 1088 de Juan-Sanz, J., Holt, G. T., Schreiter, E. R., de Juan, F., Kim, D. S., & Ryan, T. A. (2017).  
1089 Axonal Endoplasmic Reticulum Ca<sup>2+</sup> Content Controls Release Probability in CNS Nerve  
1090 Terminals. *Neuron*, 93(4), 867–881.e6. <http://doi.org/10.1016/j.neuron.2017.01.010>

- 1091 Dunwiddie, T. V., & Masino, S. A. (2001). The role and regulation of adenosine in the central  
1092 nervous system. *Annual Review of Neuroscience*, 24(1), 31–55.  
1093 <http://doi.org/10.1146/annurev.neuro.24.1.31>
- 1094 Emptage, N. J., Reid, C. A., & Fine, A. (2001). Calcium Stores in Hippocampal Synaptic  
1095 Boutons Mediate Short-Term Plasticity, Store-Operated Ca<sup>2+</sup> Entry, and Spontaneous  
1096 Transmitter Release. *Neuron*, 29(1), 197–208. [http://doi.org/10.1016/S0896-6273\(01\)00190-8](http://doi.org/10.1016/S0896-6273(01)00190-8)  
1097 8
- 1098 Espinosa, F., & Kavalali, E. T. (2009). NMDA Receptor Activation by Spontaneous  
1099 Glutamatergic Neurotransmission. *Journal of Neurophysiology*, 101(5), 2290–2296.  
1100 <http://doi.org/10.1152/jn.90754.2008>
- 1101 Fan, M. M. Y., Fernandes, H. B., Zhang, L. Y. J., Hayden, M. R., & Raymond, L. A. (2007).  
1102 Altered NMDA receptor trafficking in a yeast artificial chromosome transgenic mouse  
1103 model of Huntington's disease. *The Journal of Neuroscience : the Official Journal of the*  
1104 *Society for Neuroscience*, 27(14), 3768–3779. <http://doi.org/10.1523/JNEUROSCI.4356-06.2007>  
1105 06.2007
- 1106 Fishbein, I., & Segal, M. (2007). Miniature synaptic currents become neurotoxic to chronically  
1107 silenced neurons. *Cerebral Cortex (New York, N.Y. : 1991)*, 17(6), 1292–1306.  
1108 <http://doi.org/10.1093/cercor/bhl037>
- 1109 Frank, C. A., Kennedy, M. J., Goold, C. P., Marek, K. W., & Davis, G. W. (2006). Mechanisms  
1110 underlying the rapid induction and sustained expression of synaptic homeostasis. *Neuron*,  
1111 52(4), 663–677. <http://doi.org/10.1016/j.neuron.2006.09.029>
- 1112 Fredj, N. B., & Burrone, J. (2009). A resting pool of vesicles is responsible for spontaneous  
1113 vesicle fusion at the synapse. *Nature Neuroscience*, 12(6), 751–758.  
1114 <http://doi.org/10.1038/nn.2317>
- 1115 Graveland, G. A., Williams, R. S., & DiFiglia, M. (1985). Evidence for degenerative and  
1116 regenerative changes in neostriatal spiny neurons in Huntington's disease. *Science (New*  
1117 *York, N.Y.)*, 227(4688), 770–773.
- 1118 Gross, G. G., Junge, J. A., Mora, R. J., Kwon, H.-B., Olson, C. A., Takahashi, T. T., et al.  
1119 (2013). Recombinant probes for visualizing endogenous synaptic proteins in living neurons.  
1120 *Neuron*, 78(6), 971–985. <http://doi.org/10.1016/j.neuron.2013.04.017>
- 1121 Hantraye, P., Riche, D., Maziere, M., & Isacson, O. (1990). A primate model of Huntington's  
1122 disease: behavioral and anatomical studies of unilateral excitotoxic lesions of the caudate-  
1123 putamen in the baboon. *Experimental Neurology*, 108(2), 91–104.
- 1124 Joshi, P. R., Wu, N.-P., André, V. M., Cummings, D. M., Cepeda, C., Joyce, J. A., et al. (2009).  
1125 Age-dependent alterations of corticostriatal activity in the YAC128 mouse model of  
1126 Huntington disease. *The Journal of Neuroscience : the Official Journal of the Society for*  
1127 *Neuroscience*, 29(8), 2414–2427. <http://doi.org/10.1523/JNEUROSCI.5687-08.2009>
- 1128 Kavalali, E. T. (2015). The mechanisms and functions of spontaneous neurotransmitter release.  
1129 *Nature Reviews. Neuroscience*, 16(1), 5–16. <http://doi.org/10.1038/nrn3875>
- 1130 Kovalenko, M., Milnerwood, A., Giordano, J., St Claire, J., Guide, J. R., Stromberg, M., et al.  
1131 (2018). HttQ111/+ Huntington's Disease Knock-in Mice Exhibit Brain Region-Specific  
1132 Morphological Changes and Synaptic Dysfunction. *Journal of Huntington's Disease*, 7(1),  
1133 17–33. <http://doi.org/10.3233/JHD-170282>
- 1134 Lindhout, F. W., Cao, Y., Kevenaar, J. T., Bodzēta, A., Stucchi, R., Boumpoutsari, M. M., et al.  
1135 (2019). VAP-SCRN1 interaction regulates dynamic endoplasmic reticulum remodeling and



- 1136 presynaptic function. *The EMBO Journal*, 38(20), e101345.  
1137 <http://doi.org/10.15252/embj.2018101345>
- 1138 Llano, I., González, J., Caputo, C., Lai, F. A., Blayney, L. M., Tan, Y. P., & Marty, A. (2000).  
1139 Presynaptic calcium stores underlie large-amplitude miniature IPSCs and spontaneous  
1140 calcium transients. *Nature Neuroscience*, 3(12), 1256–1265. <http://doi.org/10.1038/81781>  
1141 McKinney, R. A., Capogna, M., Dürr, R., Gähwiler, B. H., & Thompson, S. M. (1999).  
1142 Miniature synaptic events maintain dendritic spines via AMPA receptor activation. *Nature*  
1143 *Neuroscience*, 2(1), 44–49. <http://doi.org/10.1038/4548>
- 1144 Meissner, G. (2017). The structural basis of ryanodine receptor ion channel function. *The*  
1145 *Journal of General Physiology*, 149(12), 1065–1089. <http://doi.org/10.1085/jgp.201711878>
- 1146 Miller, B. R., Dorner, J. L., Shou, M., Sari, Y., Barton, S. J., Sengelaub, D. R., et al. (2008). Up-  
1147 regulation of GLT1 expression increases glutamate uptake and attenuates the Huntington's  
1148 disease phenotype in the R6/2 mouse. *Neuroscience*, 153(1), 329–337.  
1149 <http://doi.org/10.1016/j.neuroscience.2008.02.004>
- 1150 Milnerwood, A. J., Gladding, C. M., Pouladi, M. A., Kaufman, A. M., Hines, R. M., Boyd, J. D.,  
1151 et al. (2010). Early Increase in Extrasynaptic NMDA Receptor Signaling and Expression  
1152 Contributes to Phenotype Onset in Huntington's Disease Mice. *Neuron*, 65(2), 178–190.  
1153 <http://doi.org/10.1016/j.neuron.2010.01.008>
- 1154 Milnerwood, A. J., Kaufman, A. M., Sepers, M. D., Gladding, C. M., Zhang, L., Wang, L., et al.  
1155 (2012). Mitigation of augmented extrasynaptic NMDAR signaling and apoptosis in cortico-  
1156 striatal co-cultures from Huntington's disease mice. *Neurobiology of Disease*, 48(1), 40–51.  
1157 <http://doi.org/10.1016/j.nbd.2012.05.013>
- 1158 Morton, A. J., & Edwardson, J. M. (2001). Progressive depletion of complexin II in a transgenic  
1159 mouse model of Huntington's disease. *Journal of Neurochemistry*, 76(1), 166–172.  
1160 <http://doi.org/10.1046/j.1471-4159.2001.00059.x>
- 1161 Morton, A. J., Faull, R. L., & Edwardson, J. M. (2001). Abnormalities in the synaptic vesicle  
1162 fusion machinery in Huntington's disease. *Brain Research Bulletin*, 56(2), 111–117.  
1163 [http://doi.org/10.1016/s0361-9230\(01\)00611-6](http://doi.org/10.1016/s0361-9230(01)00611-6)
- 1164 Parsons, M. P., Vanni, M. P., Woodard, C. L., Kang, R., Murphy, T. H., & Raymond, L. A.  
1165 (2016). Real-time imaging of glutamate clearance reveals normal striatal uptake in  
1166 Huntington disease mouse models. *Nature Communications*, 7, 11251.  
1167 <http://doi.org/10.1038/ncomms11251>
- 1168 Peled, E. S., Newman, Z. L., & Isacoff, E. Y. (2014). Evoked and spontaneous transmission  
1169 favored by distinct sets of synapses. *Current Biology : CB*, 24(5), 484–493.  
1170 <http://doi.org/10.1016/j.cub.2014.01.022>
- 1171 Plotkin, J. L., Day, M., Peterson, J. D., Xie, Z., Kress, G. J., Rafalovich, I., et al. (2014).  
1172 Impaired TrkB Receptor Signaling Underlies Corticostriatal Dysfunction in Huntington's  
1173 Disease. *Neuron*, 83(1), 178–188. <http://doi.org/10.1016/j.neuron.2014.05.032>
- 1174 Raymond, L. A., André, V. M., Cepeda, C., Gladding, C. M., Milnerwood, A. J., & Levine, M.  
1175 S. (2011). Pathophysiology of Huntington's disease: time-dependent alterations in synaptic  
1176 and receptor function. *Neuroscience*, 198, 252–273.  
1177 <http://doi.org/10.1016/j.neuroscience.2011.08.052>
- 1178 Reese, A. L., & Kavalali, E. T. (2016). Single synapse evaluation of the postsynaptic NMDA  
1179 receptors targeted by evoked and spontaneous neurotransmission. *eLife*, 5, 6336.  
1180 <http://doi.org/10.7554/eLife.21170>

- 1181 Ross, W. N. (2012). Understanding calcium waves and sparks in central neurons. *Nature*  
1182 *Reviews. Neuroscience*, 13(3), 157–168. <http://doi.org/10.1038/nrn3168>
- 1183 Sara, Y., Virmani, T., Deák, F., Liu, X., & Kavalali, E. T. (2005). An isolated pool of vesicles  
1184 recycles at rest and drives spontaneous neurotransmission. *Neuron*, 45(4), 563–573.  
1185 <http://doi.org/10.1016/j.neuron.2004.12.056>
- 1186 Sepers, M. D., Smith-Dijak, A., LeDue, J., Kolodziejczyk, K., Mackie, K., & Raymond, L. A.  
1187 (2017). Endocannabinoid-specific impairment in synaptic plasticity in striatum of  
1188 Huntington's disease mouse model. *The Journal of Neuroscience : the Official Journal of the*  
1189 *Society for Neuroscience*, 1739–17. <http://doi.org/10.1523/JNEUROSCI.1739-17.2017>
- 1190 Smith-Dijak, A. I., Nassrallah, W. B., Zhang, L. Y. J., Geva, M., Hayden, M. R., & Raymond, L.  
1191 A. (2019). Impairment and Restoration of Homeostatic Plasticity in Cultured Cortical  
1192 Neurons From a Mouse Model of Huntington Disease. *Frontiers in Cellular Neuroscience*,  
1193 13, 209. <http://doi.org/10.3389/fncel.2019.00209>
- 1194 Sutton, M. A., Ito, H. T., Cressy, P., Kempf, C., Woo, J. C., & Schuman, E. M. (2006). Miniature  
1195 neurotransmission stabilizes synaptic function via tonic suppression of local dendritic protein  
1196 synthesis. *Cell*, 125(4), 785–799. <http://doi.org/10.1016/j.cell.2006.03.040>
- 1197 Sutton, M. A., Taylor, A. M., Ito, H. T., Pham, A., & Schuman, E. M. (2007). Postsynaptic  
1198 decoding of neural activity: eEF2 as a biochemical sensor coupling miniature synaptic  
1199 transmission to local protein synthesis. *Neuron*, 55(4), 648–661.  
1200 <http://doi.org/10.1016/j.neuron.2007.07.030>
- 1201 Suzuki, M., Nagai, Y., Wada, K., & Koike, T. (2012). Calcium leak through ryanodine receptor  
1202 is involved in neuronal death induced by mutant huntingtin. *Biochemical and Biophysical*  
1203 *Research Communications*, 429(1-2), 18–23. <http://doi.org/10.1016/j.bbrc.2012.10.107>
- 1204 Tang, T. S., Guo, C., Wang, H., Chen, X., & Bezprozvanny, I. (2009). Neuroprotective Effects  
1205 of Inositol 1,4,5-Trisphosphate Receptor C-Terminal Fragment in a Huntington's Disease  
1206 Mouse Model. *Journal of Neuroscience*, 29(5), 1257–1266.  
1207 <http://doi.org/10.1523/JNEUROSCI.4411-08.2009>
- 1208 Tang, T.-S., Tu, H., Chan, E. Y. W., Maximov, A., Wang, Z., Wellington, C. L., et al. (2003).  
1209 Huntingtin and huntingtin-associated protein 1 influence neuronal calcium signaling  
1210 mediated by inositol-(1,4,5) triphosphate receptor type 1. *Neuron*, 39(2), 227–239.
- 1211 Tyebji, S., & Hannan, A. J. (2017). Synaptopathic mechanisms of neurodegeneration and  
1212 dementia: Insights from Huntington's disease. *Progress in Neurobiology*, 153, 18–45.  
1213 <http://doi.org/10.1016/j.pneurobio.2017.03.008>
- 1214 van de Vrede, Y., Fossier, P., Baux, G., Joels, M., & Chameau, P. (2007). Control of IsAHP in  
1215 mouse hippocampus CA1 pyramidal neurons by RyR3-mediated calcium-induced calcium  
1216 release. *Pflugers Archiv : European Journal of Physiology*, 455(2), 297–308.  
1217 <http://doi.org/10.1007/s00424-007-0277-4>
- 1218 Vonsattel, J. P., Myers, R. H., Stevens, T. J., Ferrante, R. J., Bird, E. D., & Richardson, E. P.  
1219 (1985). Neuropathological classification of Huntington's disease. *Journal of Neuropathology*  
1220 *and Experimental Neurology*, 44(6), 559–577.
- 1221 Wang, R., & Reddy, P. H. (2017). Role of Glutamate and NMDA Receptors in Alzheimer's  
1222 Disease. *Journal of Alzheimer's Disease : JAD*, 57(4), 1041–1048.  
1223 <http://doi.org/10.3233/JAD-160763>
- 1224 Wang, Y., DelRosso, N. V., Vaidyanathan, T. V., Cahill, M. K., Reitman, M. E., Pittolo, S., et al.  
1225 (2019). Accurate quantification of astrocyte and neurotransmitter fluorescence dynamics for

1226 single-cell and population-level physiology. *Nature Neuroscience*, 22(11), 1936–1944.  
1227 <http://doi.org/10.1038/s41593-019-0492-2>  
1228 Xu, J., Pang, Z. P., Shin, O.-H., & Südhof, T. C. (2009). Synaptotagmin-1 functions as a Ca<sup>2+</sup>  
1229 sensor for spontaneous release. *Nature Neuroscience*, 12(6), 759–766.  
1230 <http://doi.org/10.1038/nn.2320>  
1231 Zeron, M. M., Hansson, O., Chen, N., Wellington, C. L., Leavitt, B. R., Brundin, P., et al.  
1232 (2002). Increased Sensitivity to N-Methyl-D-Aspartate Receptor-Mediated Excitotoxicity in  
1233 a Mouse Model of Huntington's Disease. *Neuron*, 33(6), 849–860.  
1234 [http://doi.org/10.1016/S0896-6273\(02\)00615-3](http://doi.org/10.1016/S0896-6273(02)00615-3)  
1235

Figure 1:

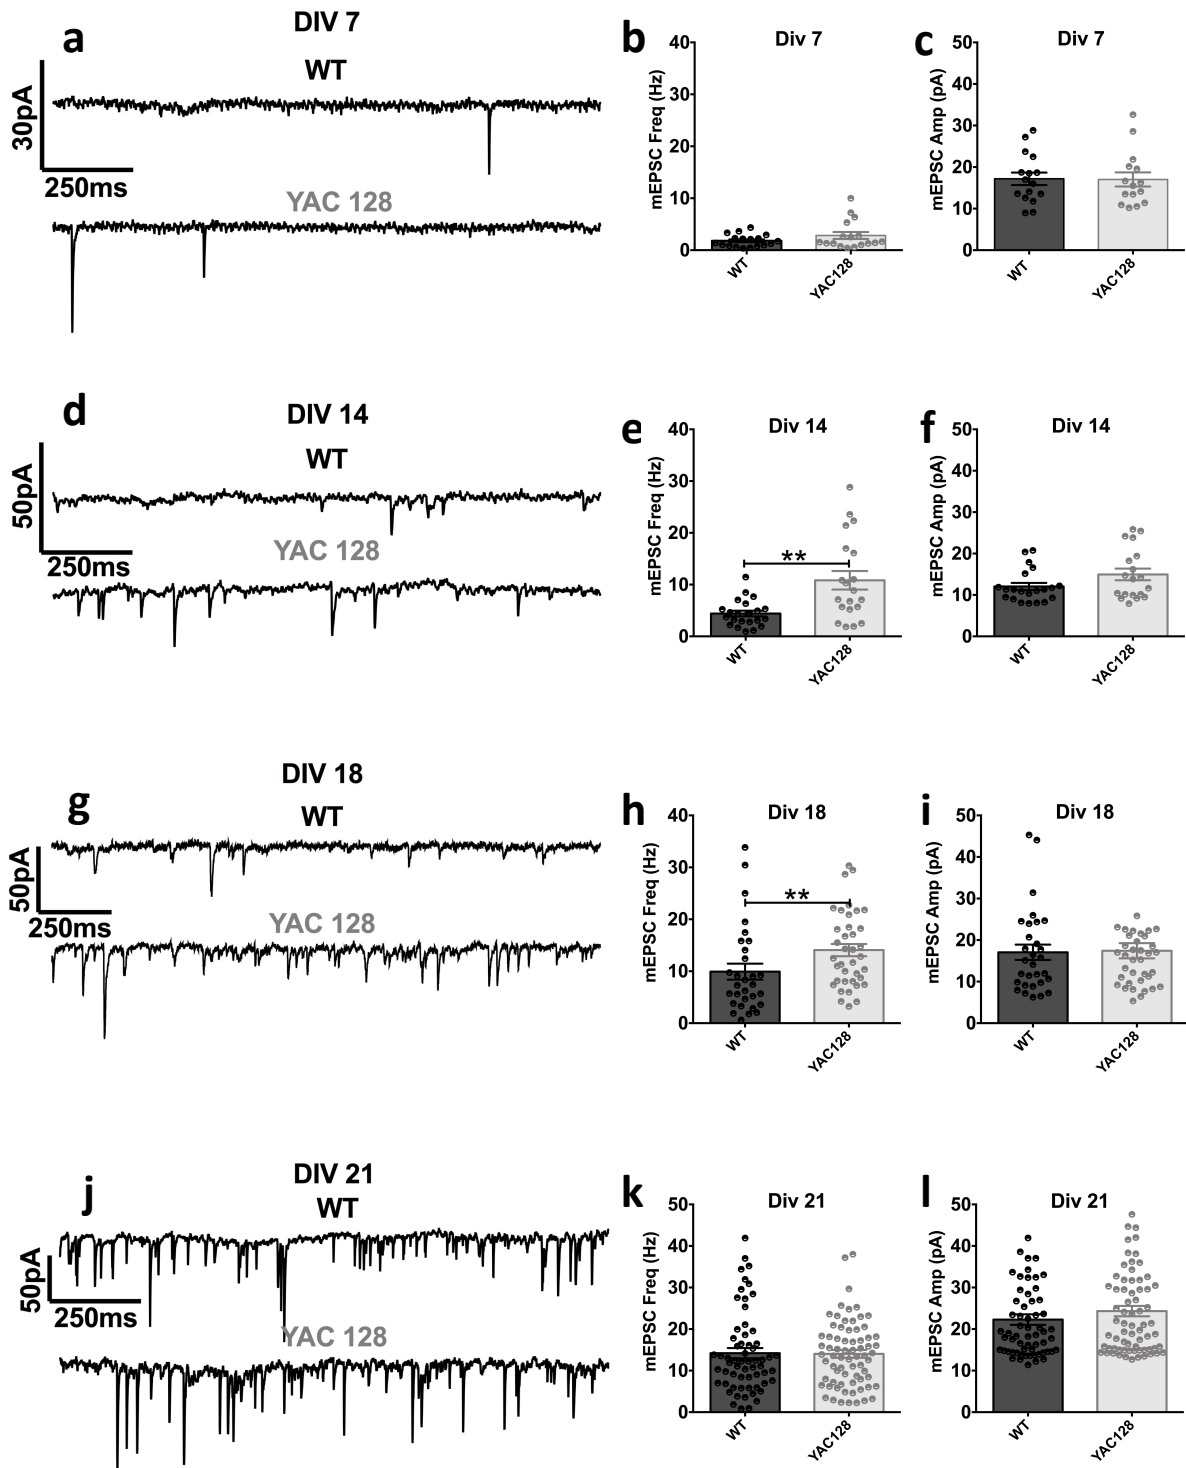

## Supplemental Figure 1:

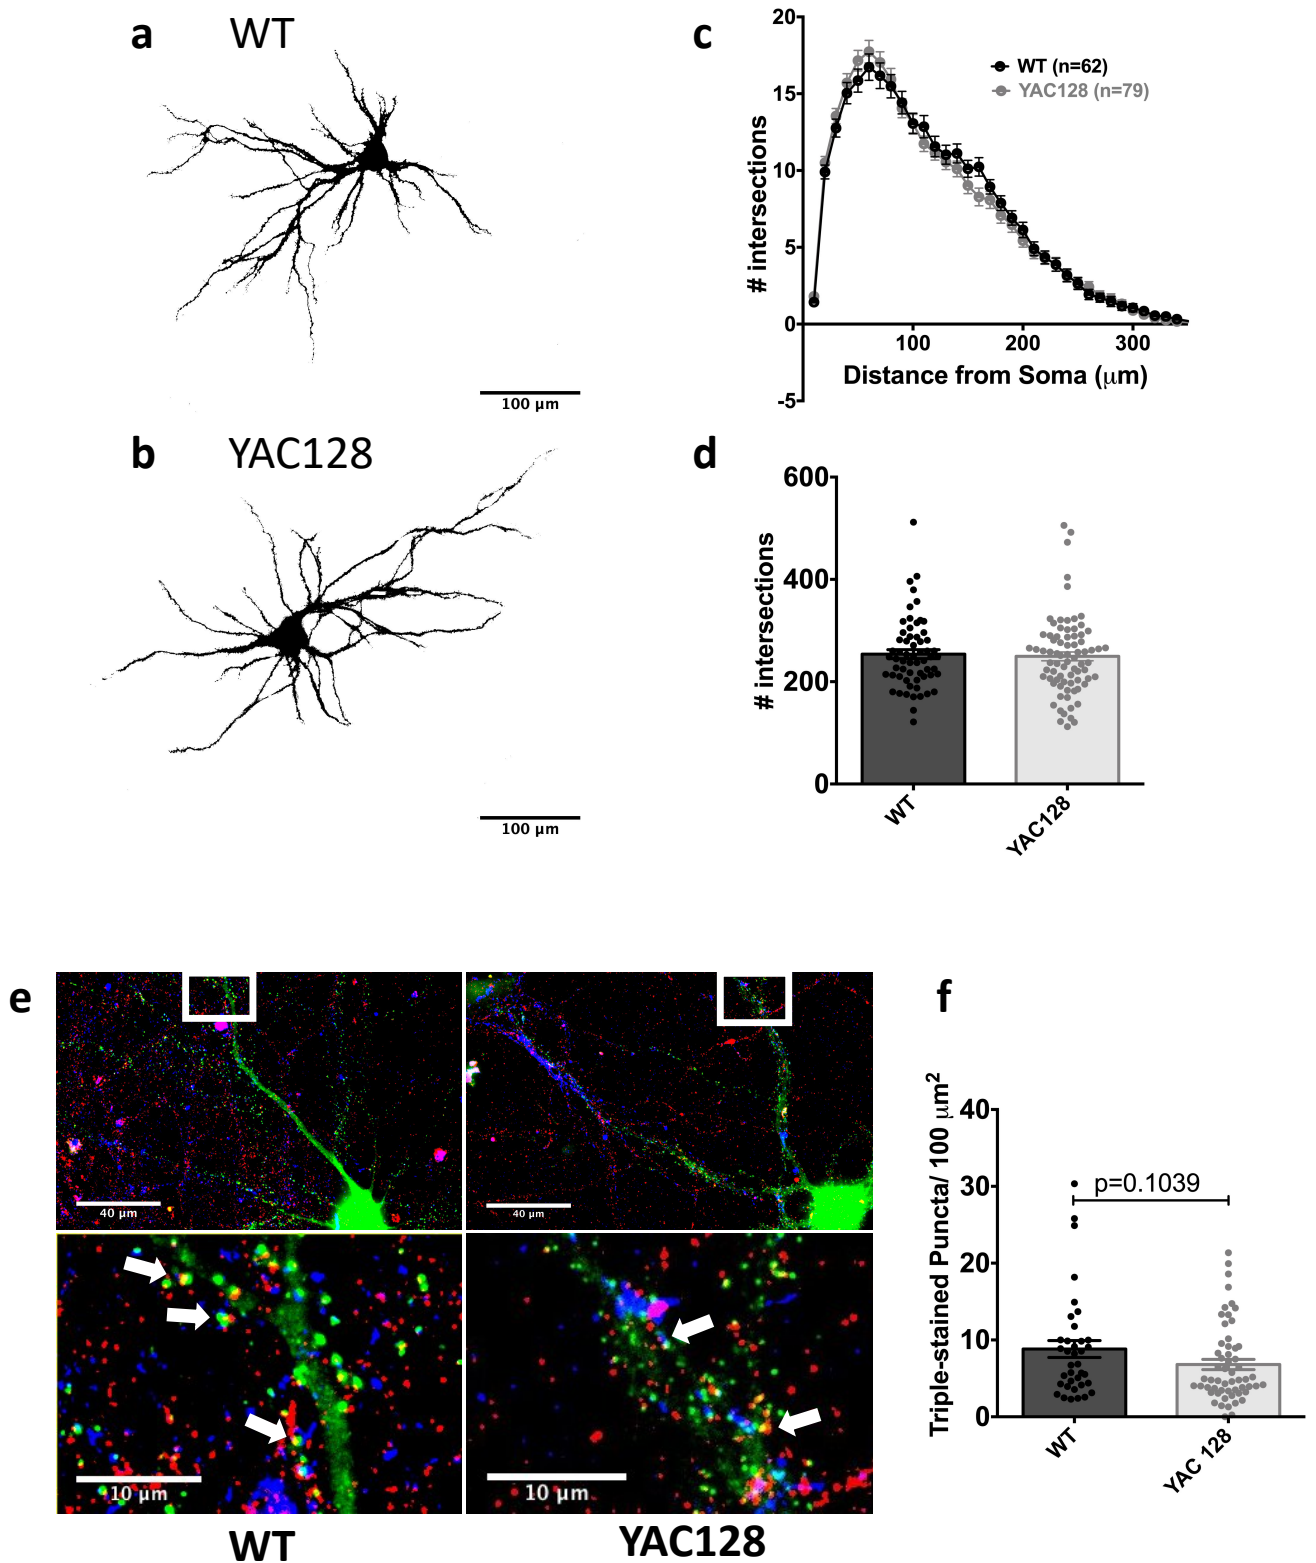

Figure 2:

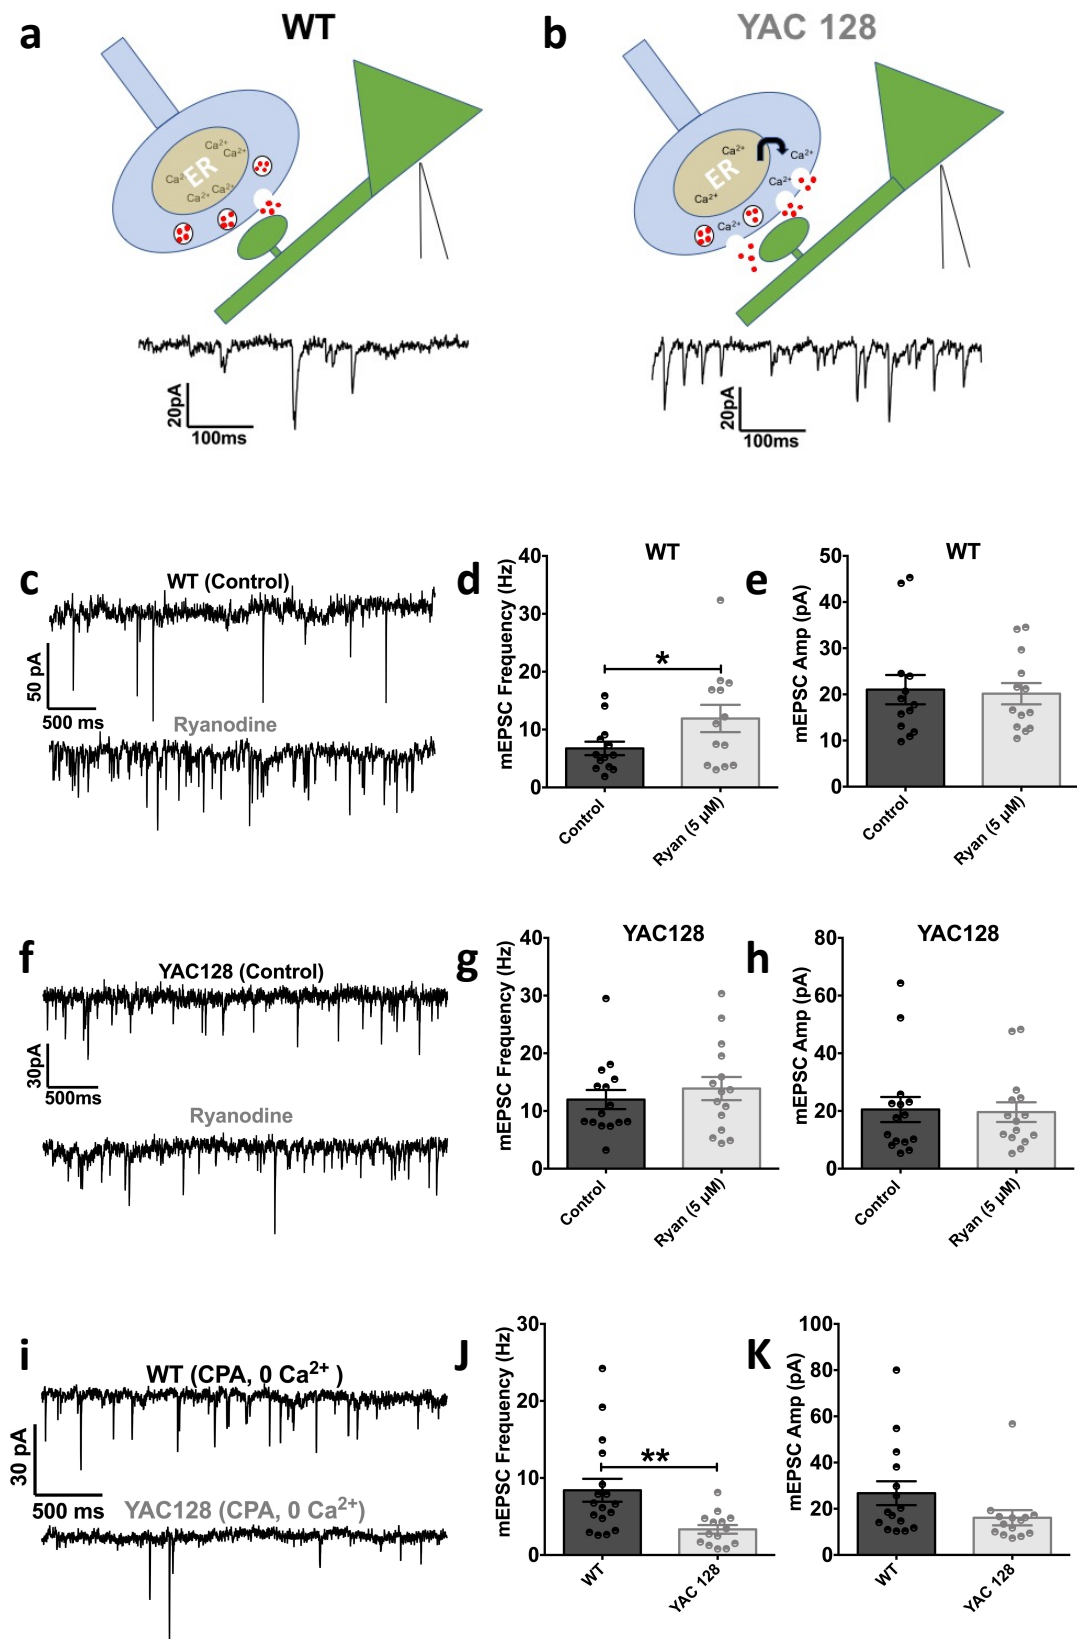

## Supplemental Figure 2:

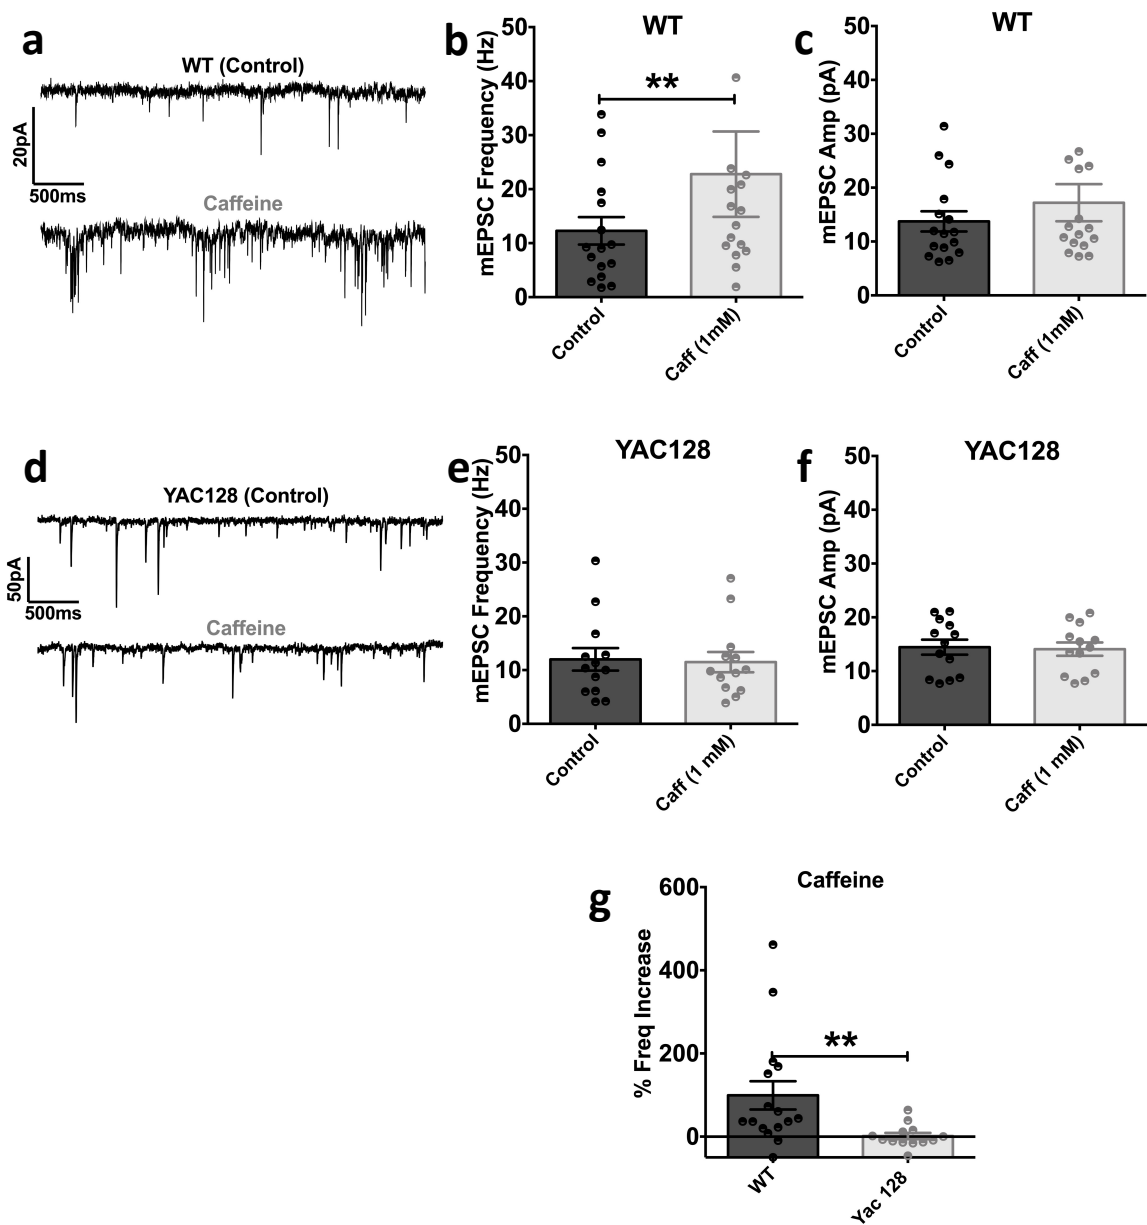

Figure 3:

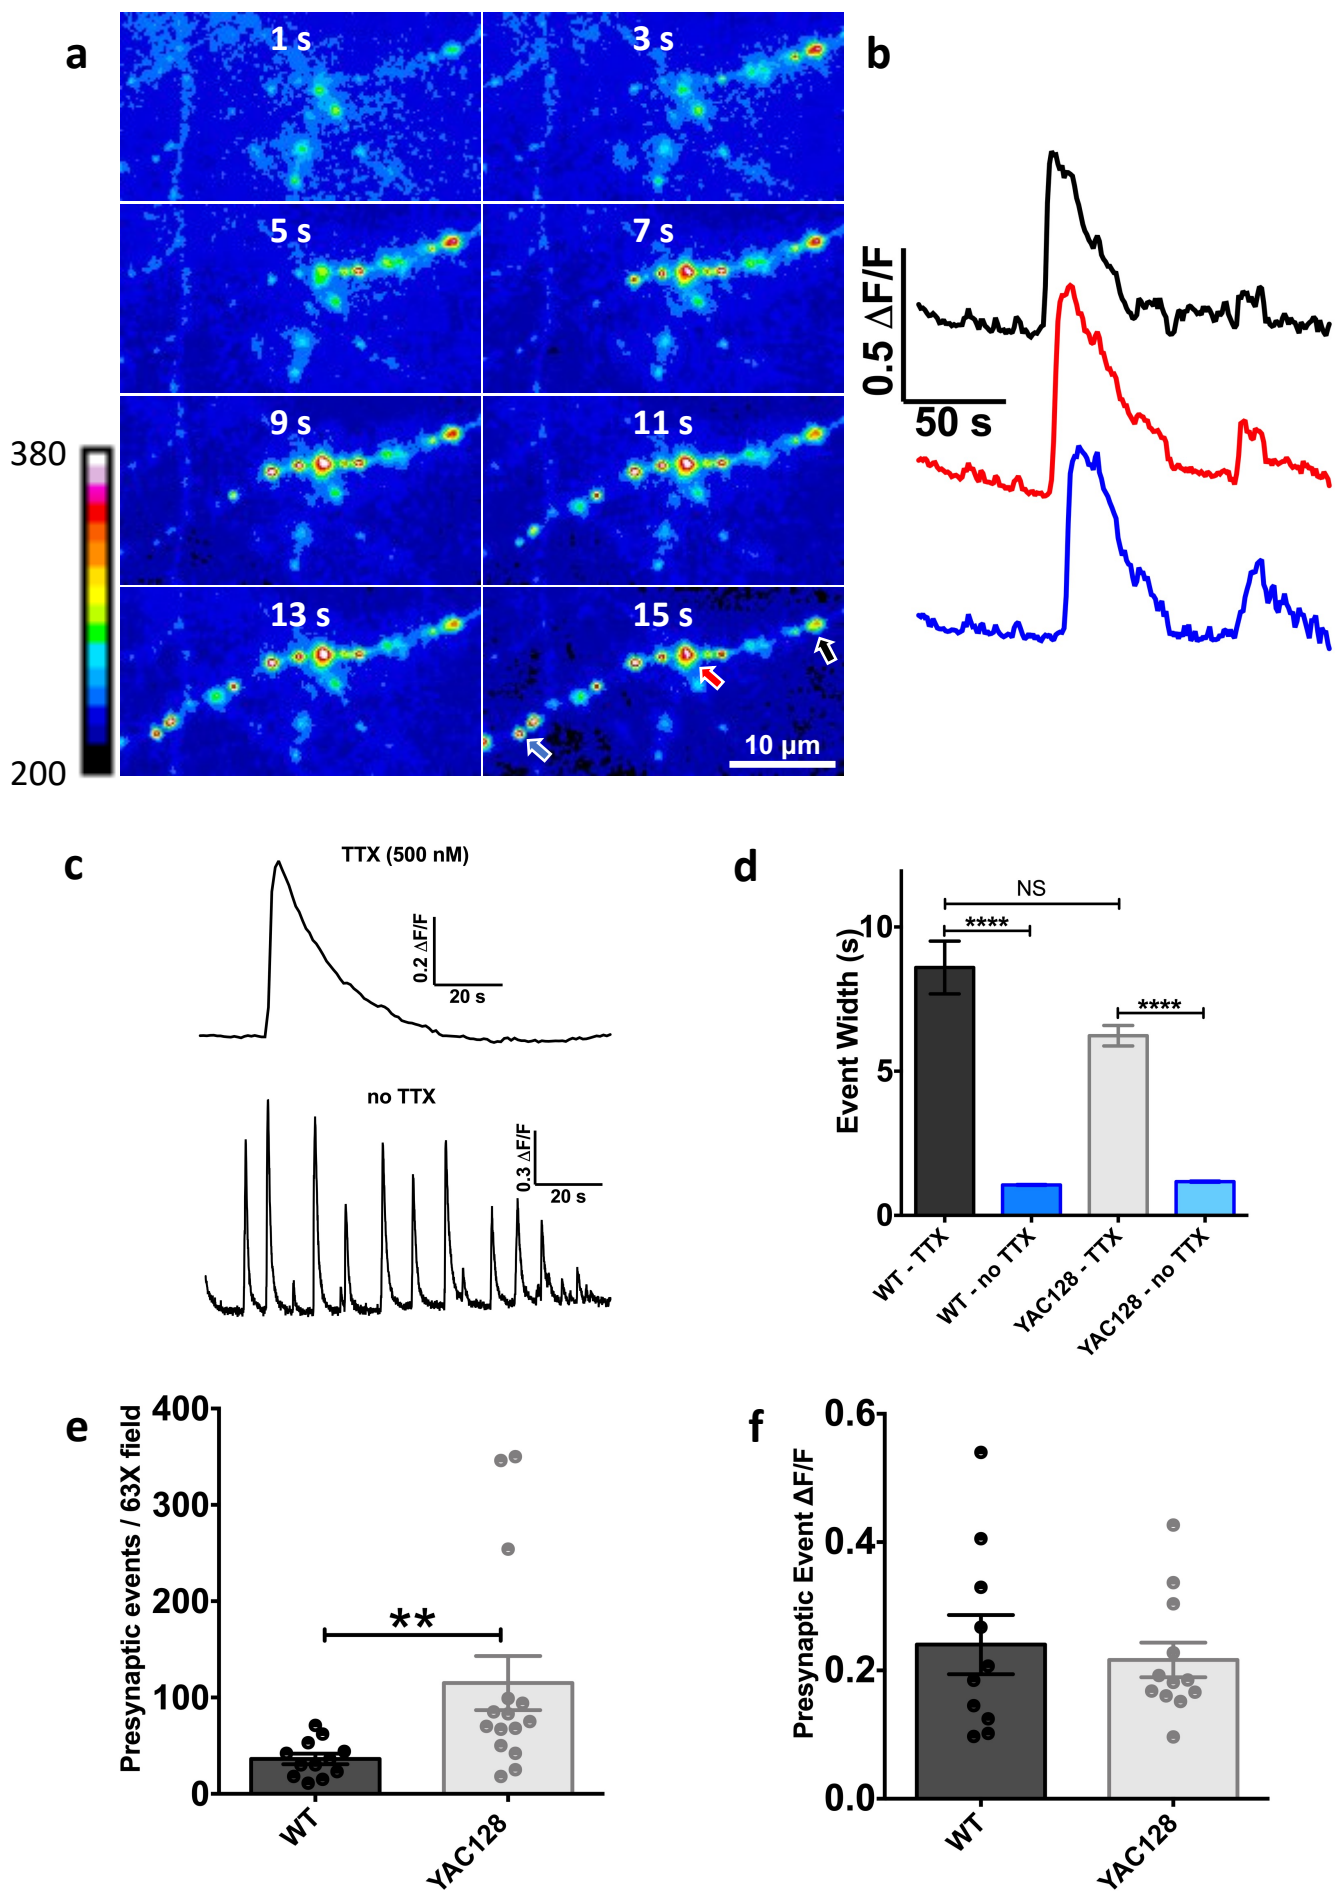



Figure 4:

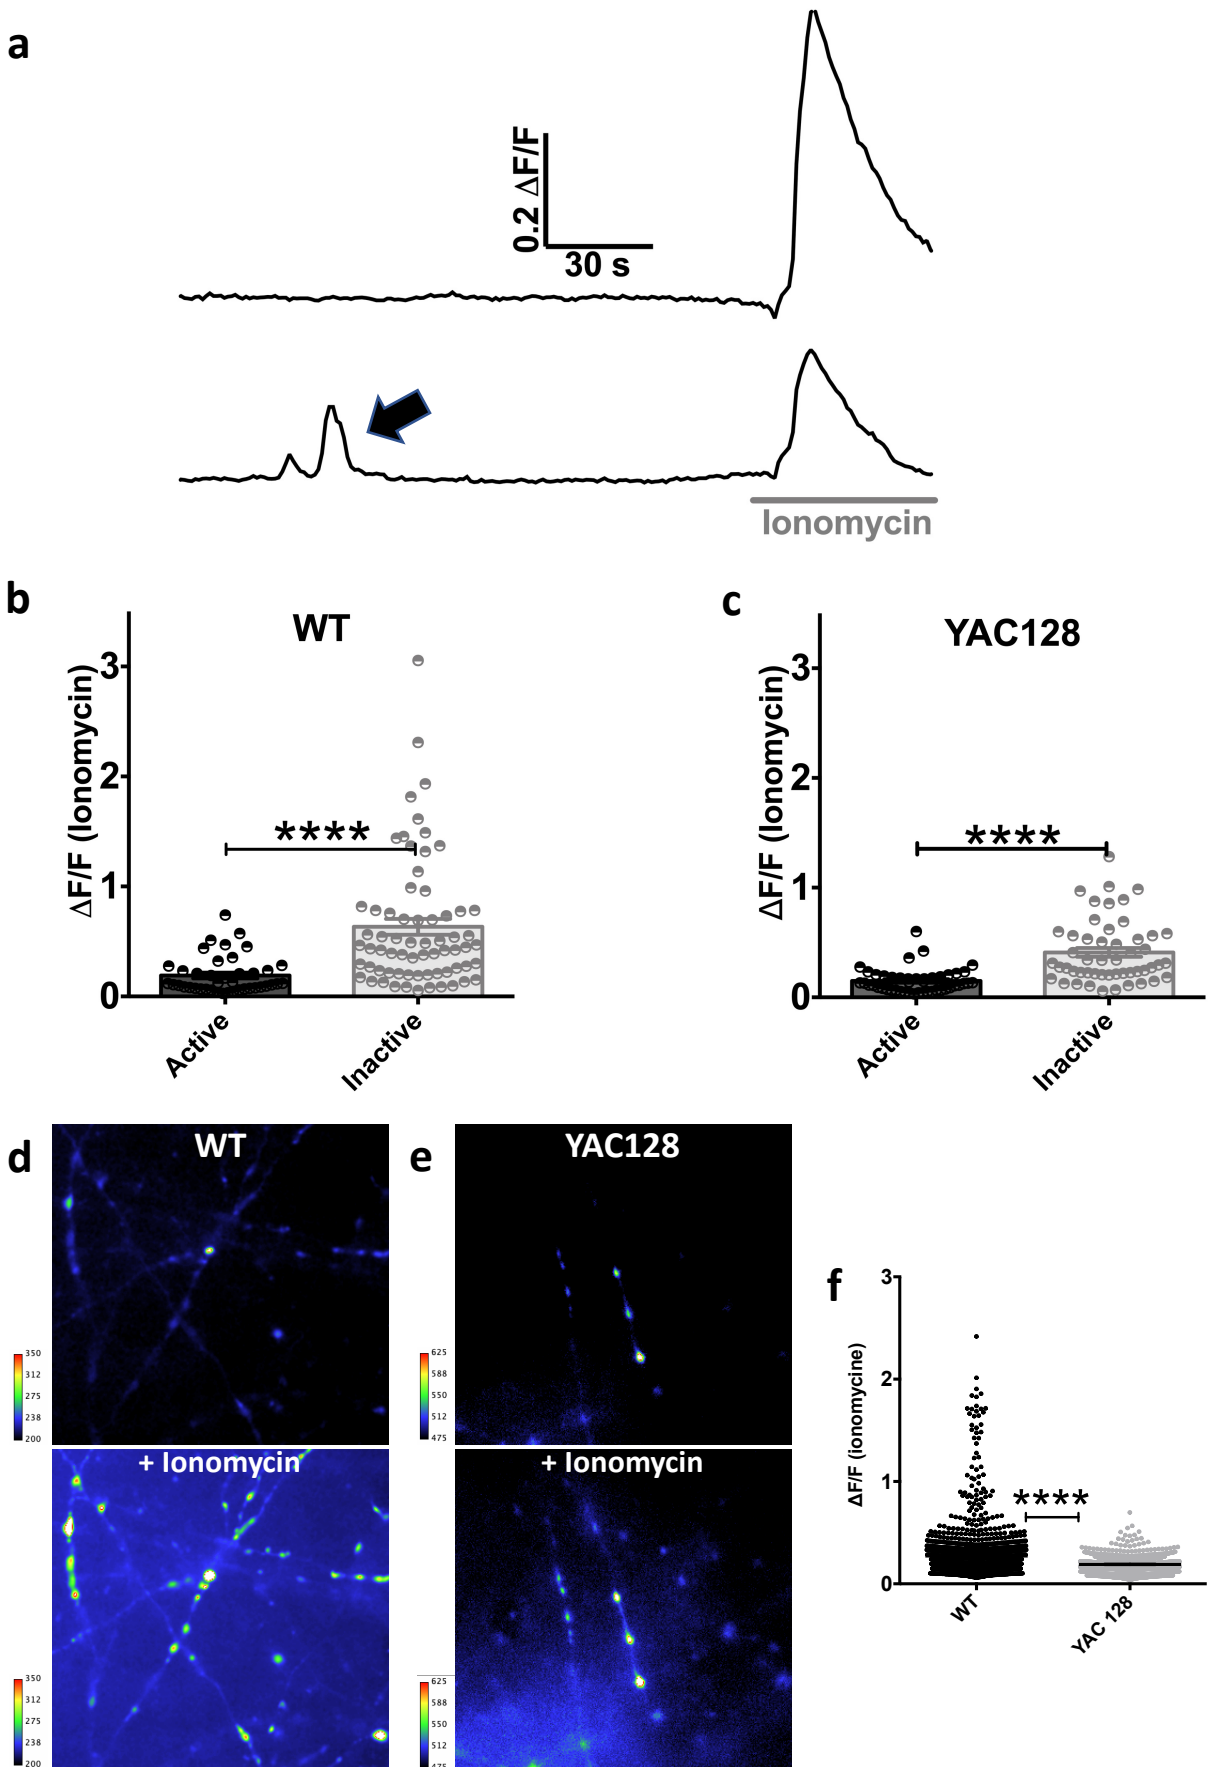

Figure 5:

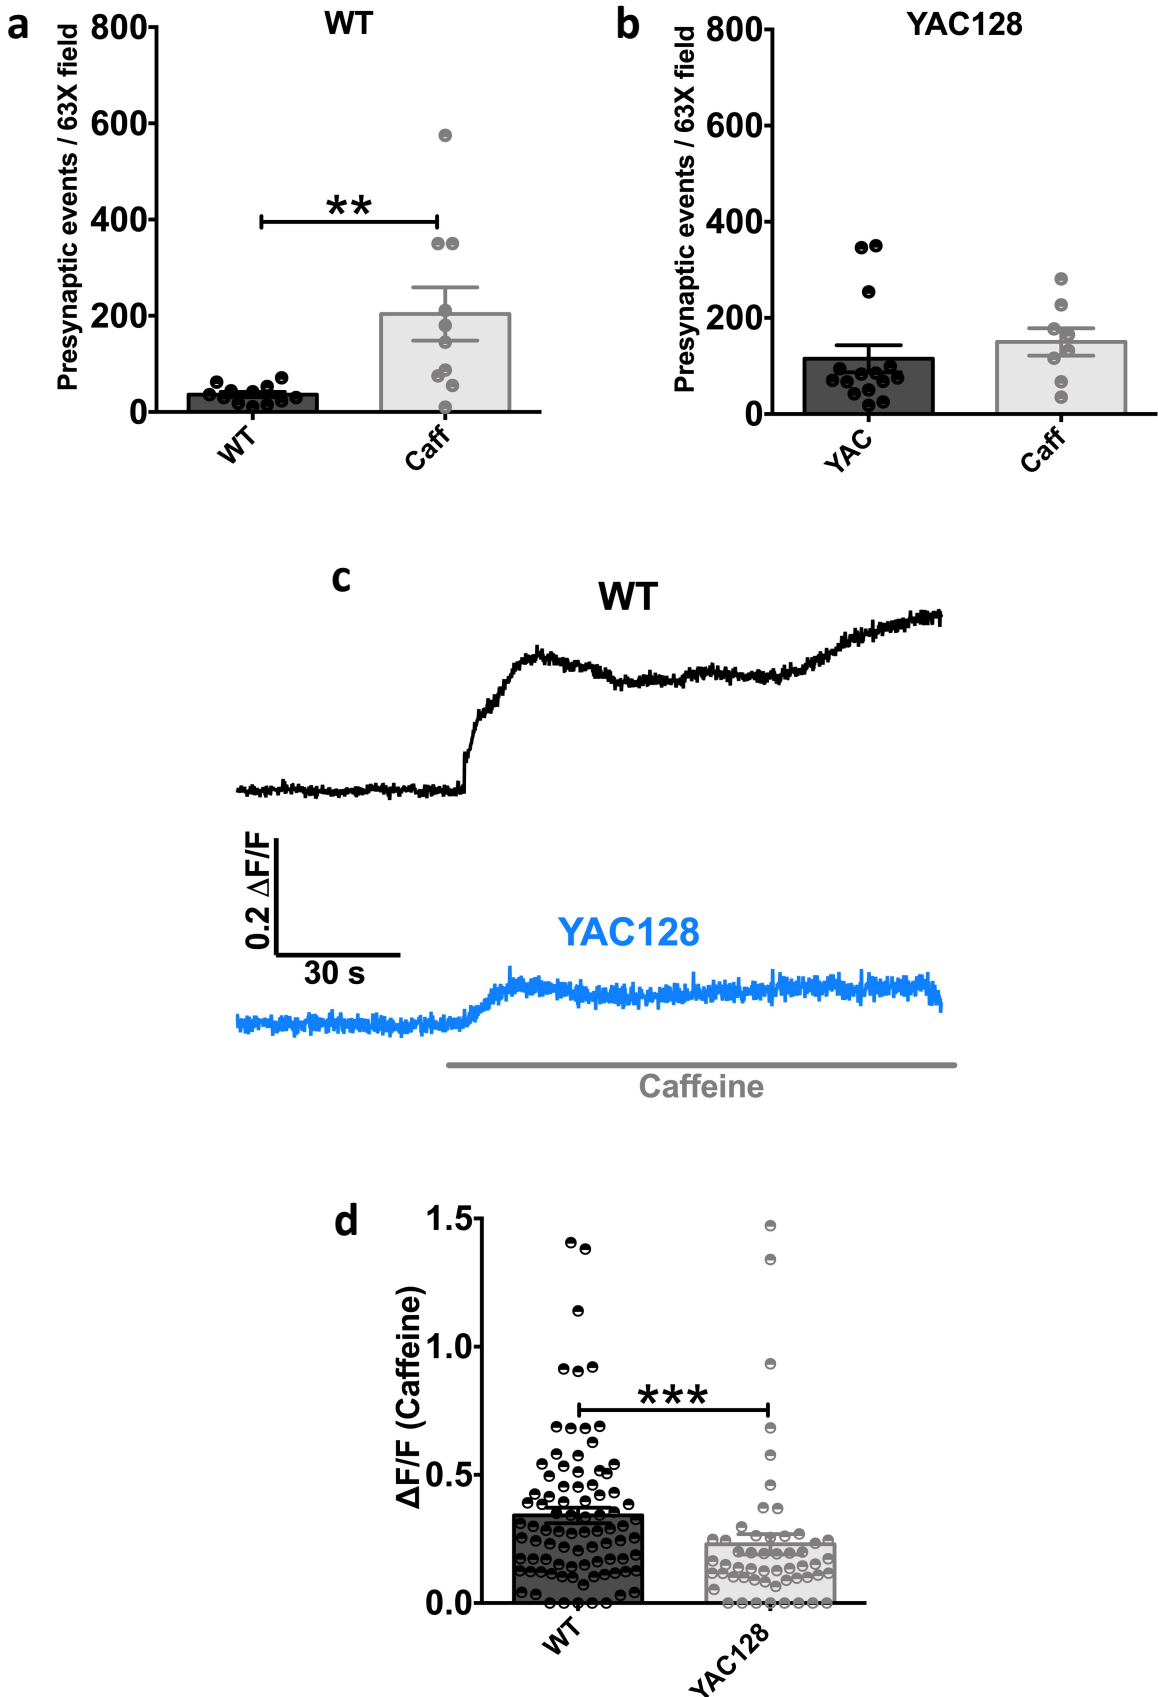

Figure 6:

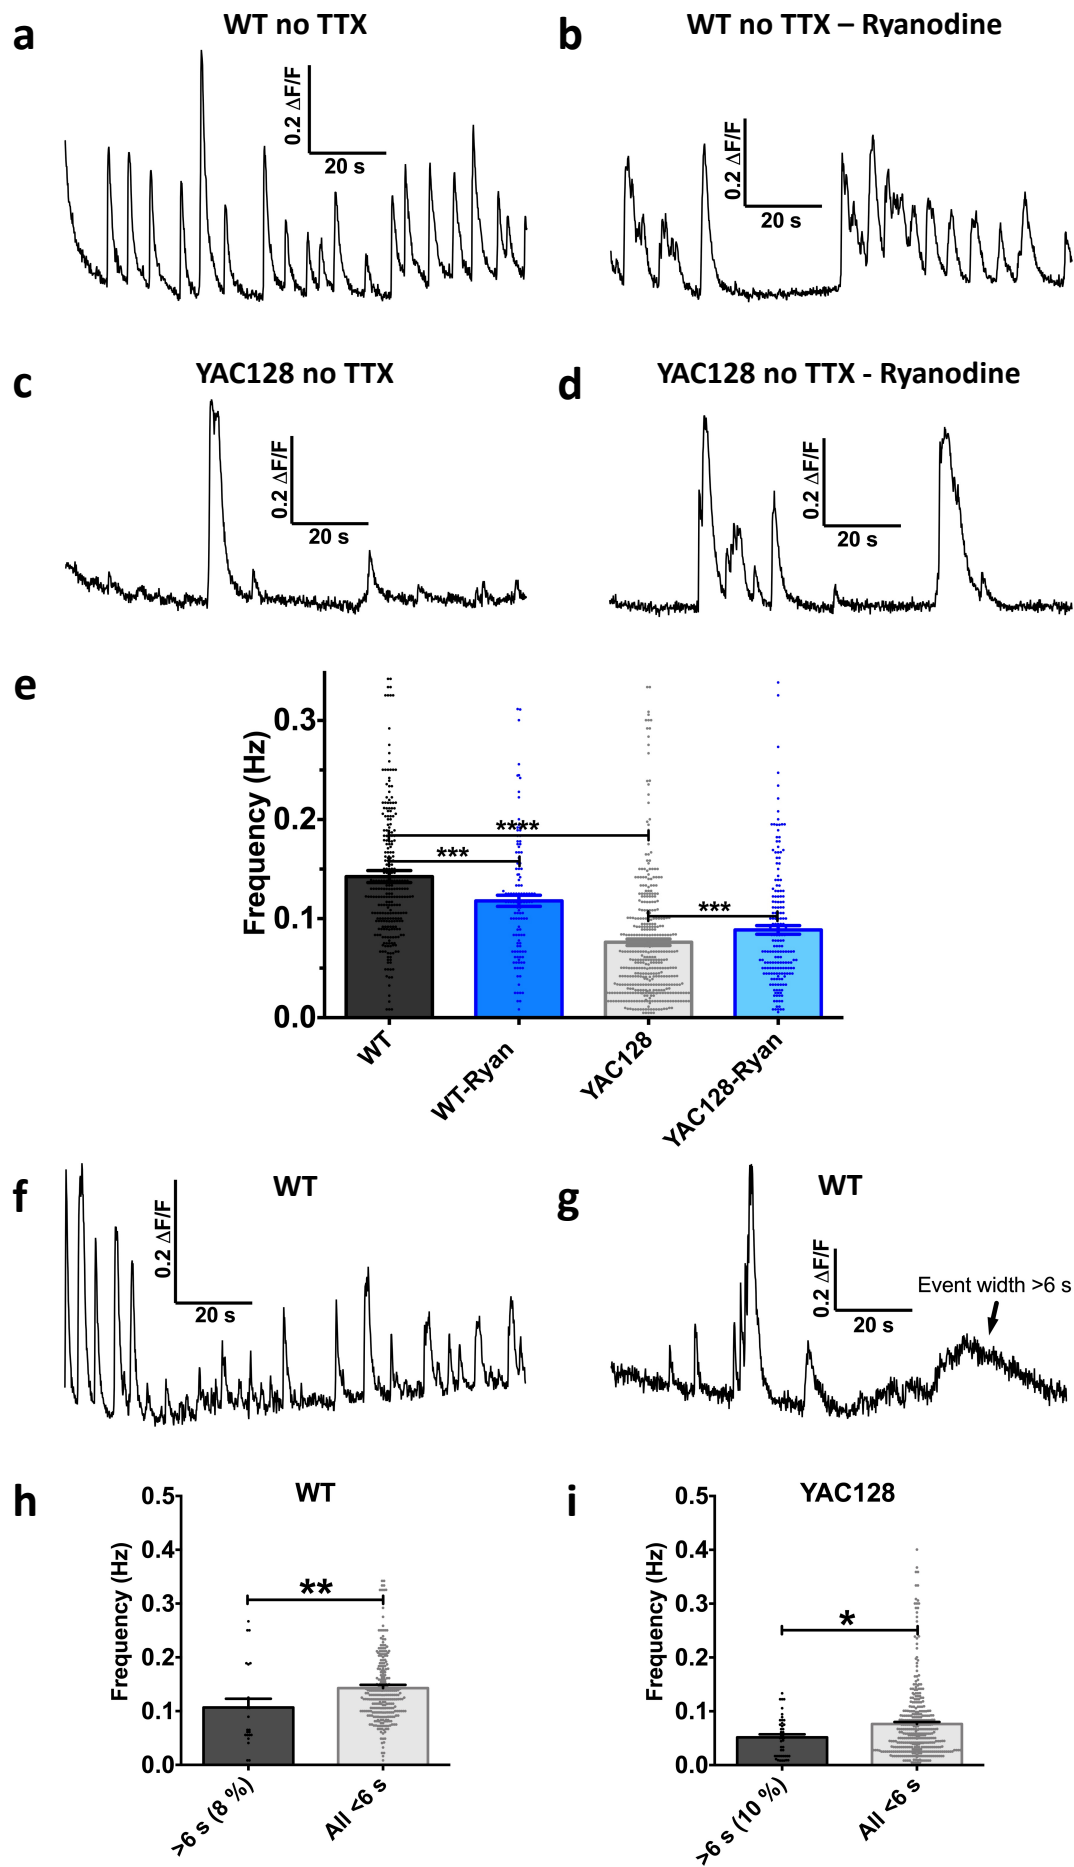

Figure 7:

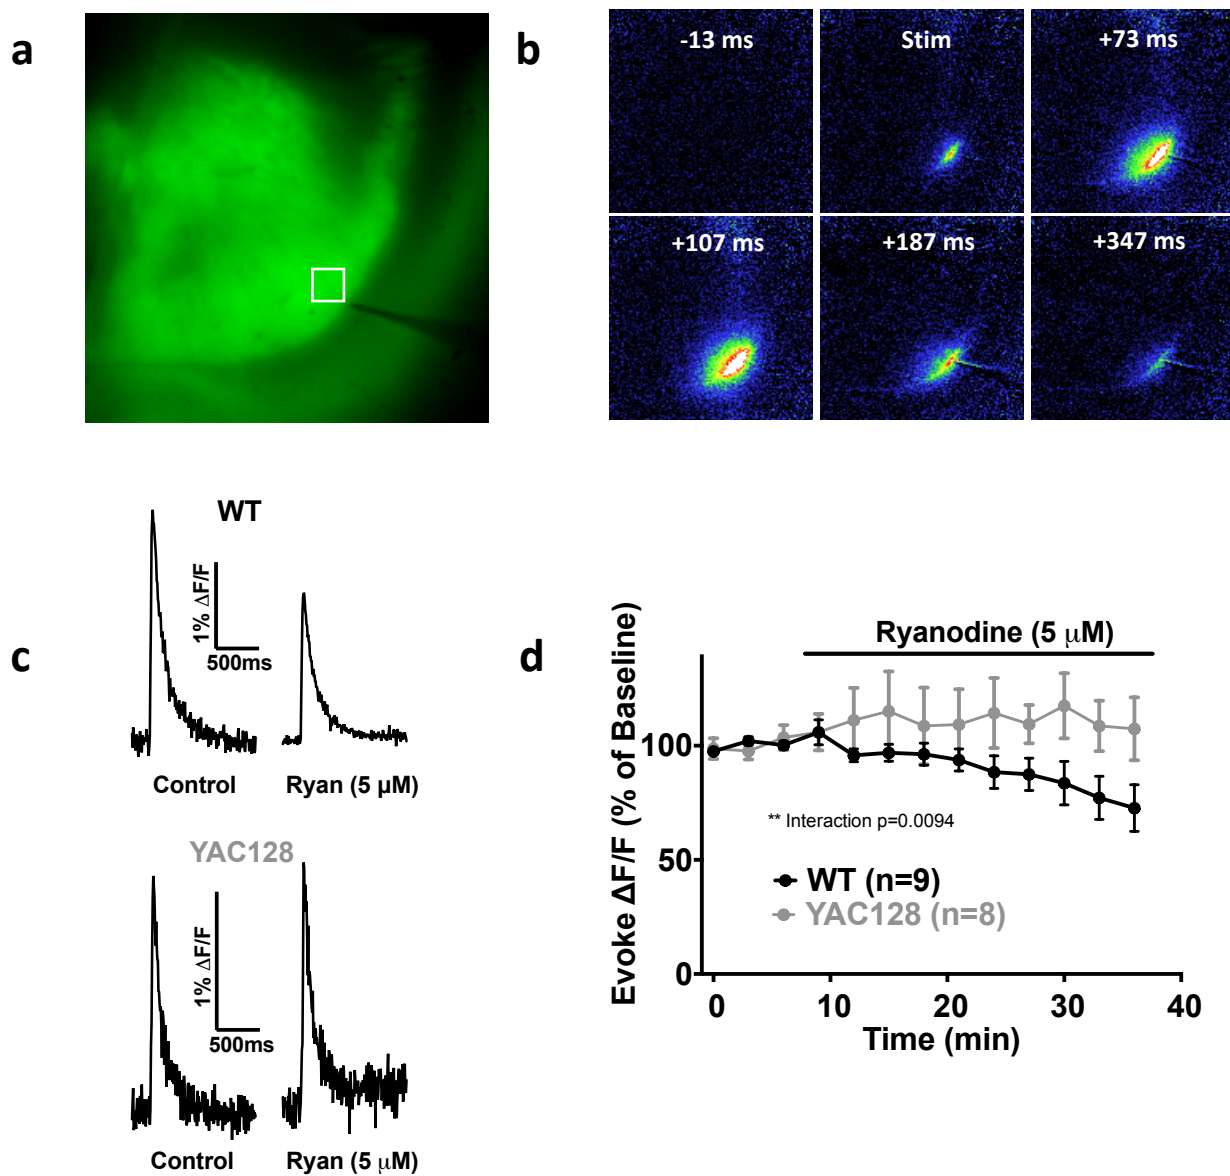

Source: https://www.biorxiv.org/content/biorxiv/early/2020/08/25/2020.01.31.929299.full.pdf
